# Supplementary material for: Childhood, adolescent, and adulthood adiposity are associated with risk of PCOS: a Mendelian randomization study with meta-analysis
Source: PubMed Central journal article supplement (PMC10233304; doi:10.1093/humrep/dead053), 2023-04-04
Supplement: dead053_supplementary_figure_s2.pdf [file dead053_supplementary_figure_s2.pdf]

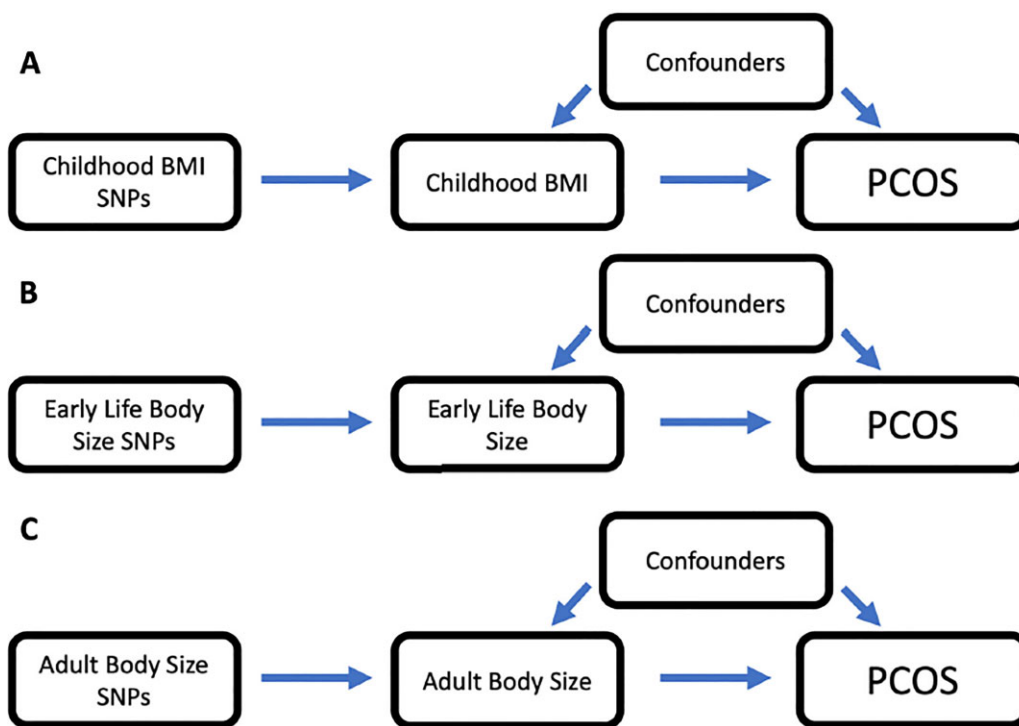

**Supplementary Figure S2. Schematic representation of MR analyses.** PCOS: polycystic ovary syndrome; SNP: single-nucleotide polymorphism; MR: Mendelian randomization.
