# Supplementary material for: Childhood, adolescent, and adulthood adiposity are associated with risk of PCOS: a Mendelian randomization study with meta-analysis
Source: PubMed Central journal article supplement (PMC10233304; doi:10.1093/humrep/dead053), 2023-04-04
Supplement: dead053_supplementary_figure_s5.pdf [file dead053_supplementary_figure_s5.pdf]

human reproduction SUPPLEMENTARY DATA

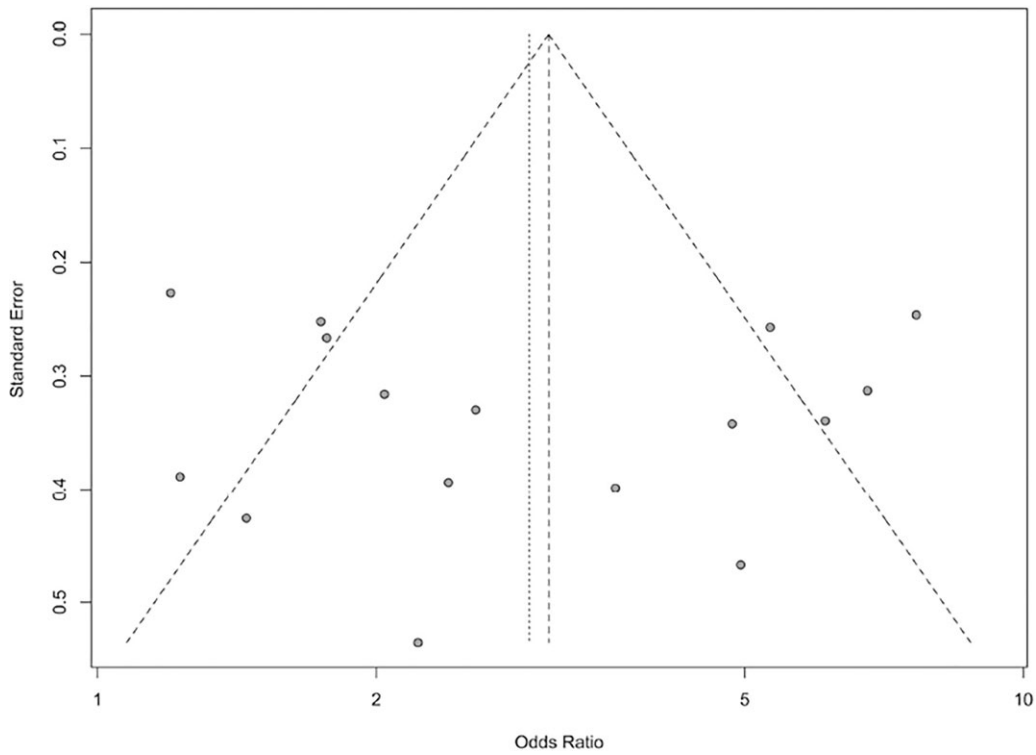

**Supplementary Figure S5. Funnel plot of central obesity meta-analysis.** X-axis = non-linear scale. Thin dotted line = mean odds ratio. Egger regression test of funnel plot asymmetry. Test result:  $t = 0.15$ ,  $df = 14$ ,  $P\text{-value} = 0.8853$ .
