# Supplementary material for: Childhood, adolescent, and adulthood adiposity are associated with risk of PCOS: a Mendelian randomization study with meta-analysis
Source: PubMed Central journal article supplement (PMC10233304; doi:10.1093/humrep/dead053), 2023-04-04
Supplement: dead053_supplementary_figure_s7.pdf [file dead053_supplementary_figure_s7.pdf]

human reproduction **SUPPLEMENTARY DATA**

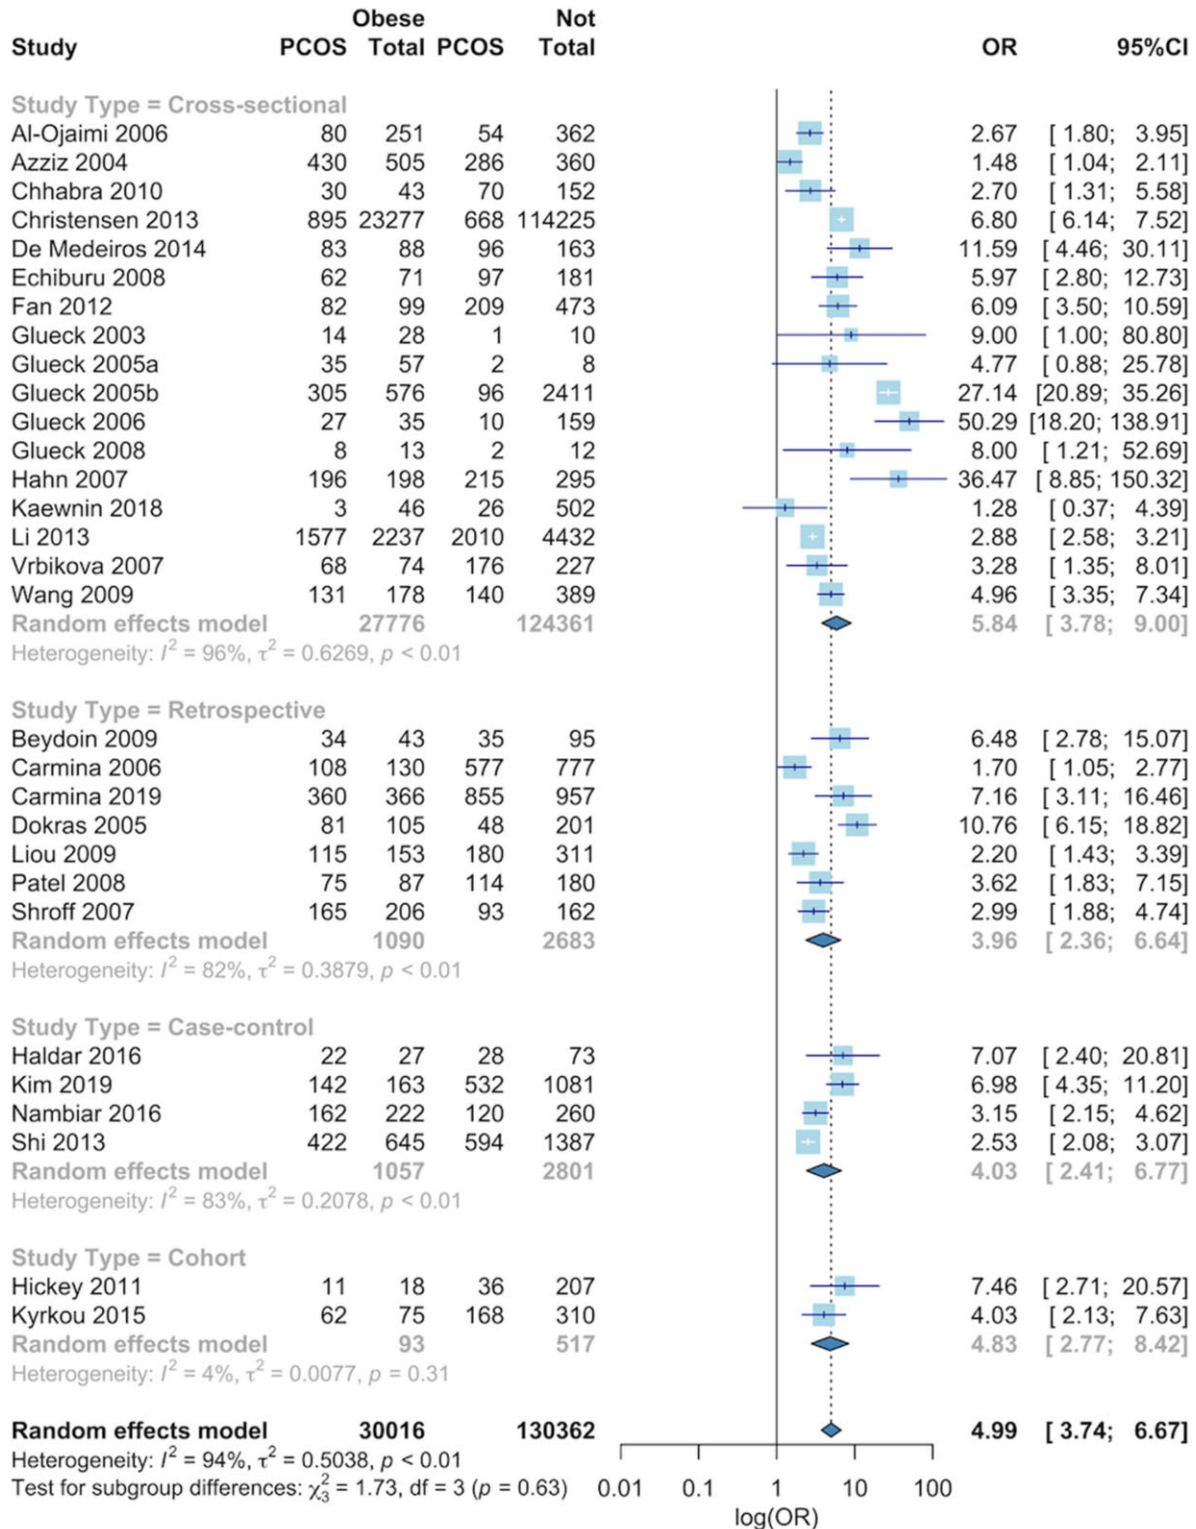

**Supplementary Figure S7. Obesity meta-analysis by study type.** Forest plot for odds ratio of PCOS in obese vs non-obese. OR: odds ratio.
