# Supplementary material for: Childhood, adolescent, and adulthood adiposity are associated with risk of PCOS: a Mendelian randomization study with meta-analysis
Source: PubMed Central journal article supplement (PMC10233304; doi:10.1093/humrep/dead053), 2023-04-04
Supplement: dead053_supplementary_figure_s8.pdf [file dead053_supplementary_figure_s8.pdf]

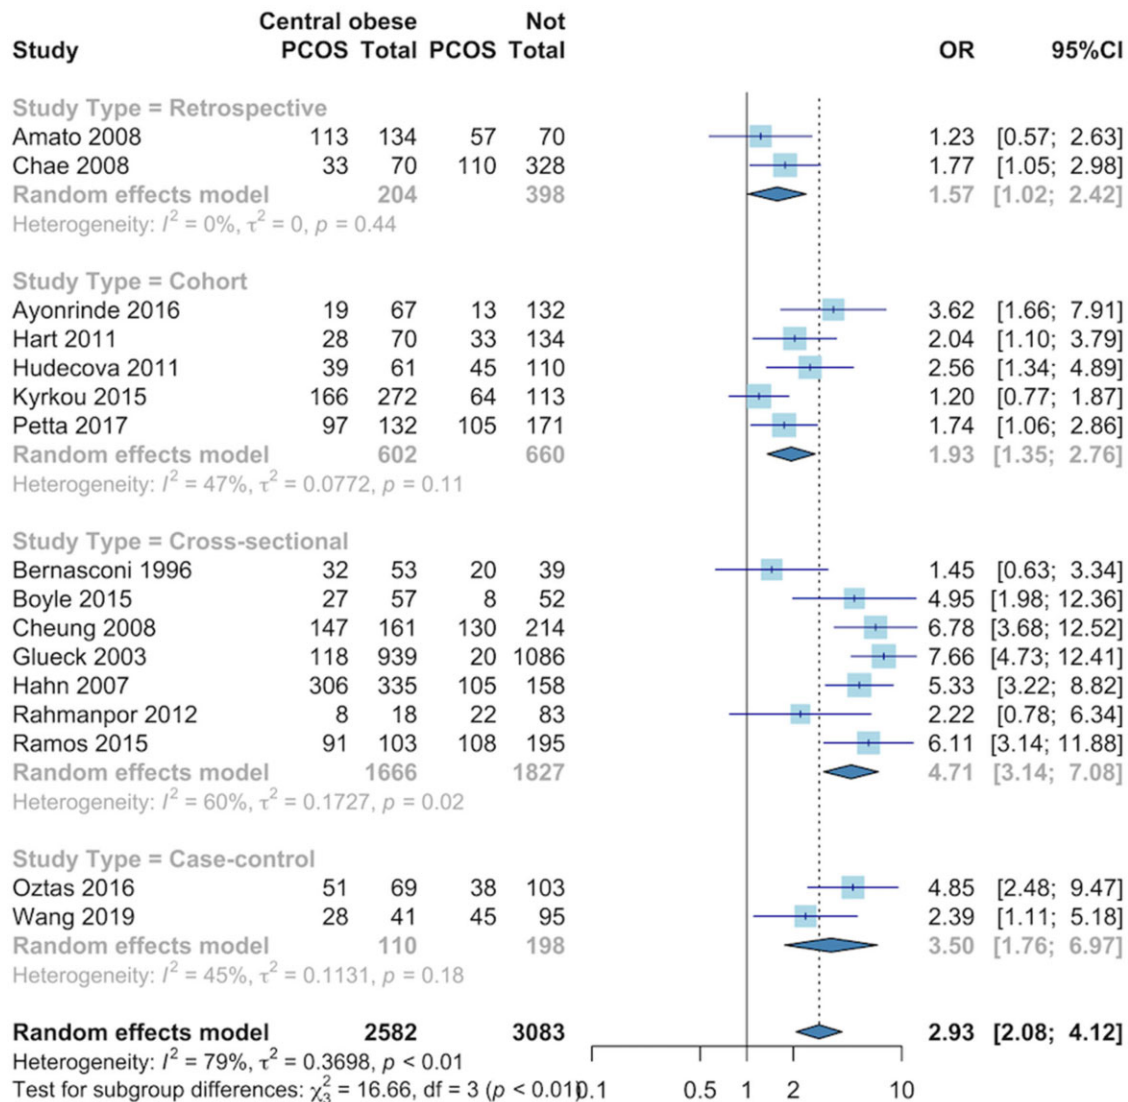

**Supplementary Figure S8. Central obesity meta-analysis by study type.** Forest plot for odds ratio of PCOS in central obese vs non-central obese. OR: odds ratio.
