# Supplementary material for: Childhood, adolescent, and adulthood adiposity are associated with risk of PCOS: a Mendelian randomization study with meta-analysis
Source: PubMed Central journal article supplement (PMC10233304; doi:10.1093/humrep/dead053), 2023-04-04
Supplement: dead053_supplementary_table_si.pdf [file dead053_supplementary_table_si.pdf]

**Supplementary Table SI MeSH terms.**

- 1 exp Polycystic Ovary Syndrome/
- 2 PCO\$.tw
- 3 polycystic ovar\$.tw
- 4 (stein-leventhal or leventhal).tw
- 5 (ovar\$ adj3 (sclerocystic or polycystic or degeneration)).tw
- 6 or/1-5
- 7 exp Obesity/
- 8 exp Overweight/
- 9 exp Body Mass Index/
- 10 exp Body Weight/
- 11 (obes\$ or overweight\$ or adipo\$).tw
- 12 over weight.tw
- 13 ((increas\$ or excess\$) adj3 weight).tw
- 14 ((increas\$ or excess\$ or high) adj3 BMI).tw
- 15 ((increas\$ or excess\$ or high) adj3 (body mass index)).tw
- 16 exp Adipose tissue/
- 17 exp Abdominal fat/
- 18 exp Skinfold Thickness/
- 19 exp Waist-Hip Ratio/
- 20 waist-hip ratio.tw
- 21 WHR.tw
- 22 skinfold.tw
- 23 abdom\$.tw
- 24 waist.tw
- 25 fat.tw
- 26 DEXA.tw
- 27 anthropometry.tw
- 28 bioimpedance.tw
- 29 or/7-28
- 30 6 and 29
- 31 animal/
- 32 human/
- 33 31 not (31 and 32)
- 34 30 not 33

MeSH: Medical Subject Heading for Medline; Exp: exploded MeSH; tw: text word; adj: adjacency; \$: any character (taken from supplementary material by [Lim et al. \(2012, Human Reproduction Update\)](#)).
