# Supplementary material for: Childhood, adolescent, and adulthood adiposity are associated with risk of PCOS: a Mendelian randomization study with meta-analysis
Source: PubMed Central journal article supplement (PMC10233304; doi:10.1093/humrep/dead053), 2023-04-04
Supplement: dead053_supplementary_table_sii.pdf [file dead053_supplementary_table_sii.pdf]

**Supplementary Table SII** Diagnostic criteria used to classify PCOS.

| <b>Diagnostic criteria</b>                         | <b>NIH Consensus 1990 (all criteria required for diagnosis)</b> | <b>ESHRE/ASRM 2003 (2/3 diagnostic criteria required) (also termed Rotterdam Criteria)</b> | <b>AE-PCOS (hyperandrogenism + one other criteria)</b> |
|----------------------------------------------------|-----------------------------------------------------------------|--------------------------------------------------------------------------------------------|--------------------------------------------------------|
| Hyperandrogenism                                   | Clinical and/or biochemical hyperandrogenism                    | Clinical and/or biochemical hyperandrogenism                                               | Clinical and/or biochemical hyperandrogenism           |
| Ovulation                                          | Oligo/amenorrhoea, anovulation                                  | Oligo/amenorrhoea, anovulation                                                             | Oligo/amenorrhoea, anovulation                         |
| Pelvic ultrasound                                  |                                                                 | Polycystic ovaries on ultrasound                                                           | Polycystic ovaries on ultrasound                       |
| Exclusion of other endocrinopathies for diagnosis? | Yes                                                             | Yes                                                                                        | Yes                                                    |

PCOS: polycystic ovary syndrome; NIH: National Institute for Health; ESHRE/ASRM: European Society of Human Reproduction and Embryology/American Society of Reproductive Medicine Criteria; AE-PCOS: Androgen Excess PCOS.  
 Adapted from [Spritzer \(2014\)](#).
