# Supplementary material for: Childhood, adolescent, and adulthood adiposity are associated with risk of PCOS: a Mendelian randomization study with meta-analysis
Source: PubMed Central journal article supplement (PMC10233304; doi:10.1093/humrep/dead053), 2023-04-04
Supplement: dead053_supplementary_table_siii.pdf [file dead053_supplementary_table_siii.pdf]

**Supplementary Table SIII Body composition definitions.**

| Variable               | Sub-group                                                              | Definition                                                               |
|------------------------|------------------------------------------------------------------------|--------------------------------------------------------------------------|
| <b>Overweight</b>      | Adults (of all ethnicities other than Asian ethnicity)                 | BMI $\geq 25$ kg/m <sup>2</sup> (World Health Organization Criteria)     |
|                        | Adults of Asian ethnicity                                              | BMI $\geq 23$ kg/m <sup>2</sup> (International Obesity Task Force)       |
|                        | Adolescents                                                            | 85–95th percentile of age-gender-specific percentile BMI distributions   |
| <b>Obesity</b>         | Adults (of all ethnicities other than Asian ethnicity)                 | BMI $\geq 30$ kg/m <sup>2</sup> (World Health Organization Criteria)     |
|                        | Adults of Asian ethnicity                                              | BMI $\geq 25$ kg/m <sup>2</sup> (International Obesity Task Force)       |
|                        | Adolescents                                                            | $\geq 95$ percentile of age-gender specific percentile BMI distributions |
| <b>Central Obesity</b> | Multiple definitions utilized according to data presented in the Study | a. WC $> 88$ cm (Adult Treatment Panel III)                              |
|                        |                                                                        | b. WHR $> 0.85$                                                          |
|                        |                                                                        | c. WC $\geq 80$ cm (International Diabetes Federation)                   |

WC: waist-circumference; WHR: waist-hip ratio.
