# Supplementary material for: Childhood, adolescent, and adulthood adiposity are associated with risk of PCOS: a Mendelian randomization study with meta-analysis
Source: PubMed Central journal article supplement (PMC10233304; doi:10.1093/humrep/dead053), 2023-04-04
Supplement: dead053_supplementary_table_siv.pdf [file dead053_supplementary_table_siv.pdf]

**Supplementary Table SIV Systematic review studies summary table.**

| Author (year)<br>DOI                                                                        | PCOS<br>(n) | Control<br>(n) | Age,<br>mean ±<br>SD                                      | PCOS<br>definition | PCOS<br>ethnicity                                                                                                                                      | Study design;<br>period                            | Country; PCOS<br>recruitment source                                                                                                                                                                                             | Control recruit-<br>ment source                 | Control description                                                                                                                                                                                                                               |
|---------------------------------------------------------------------------------------------|-------------|----------------|-----------------------------------------------------------|--------------------|--------------------------------------------------------------------------------------------------------------------------------------------------------|----------------------------------------------------|---------------------------------------------------------------------------------------------------------------------------------------------------------------------------------------------------------------------------------|-------------------------------------------------|---------------------------------------------------------------------------------------------------------------------------------------------------------------------------------------------------------------------------------------------------|
| <b>Studies from Updated Systematic Review</b>                                               |             |                |                                                           |                    |                                                                                                                                                        |                                                    |                                                                                                                                                                                                                                 |                                                 |                                                                                                                                                                                                                                                   |
| <a href="#">Aarestrup et al. (2021)</a><br>DOI: 10.1159/<br>000515294                       | 503         | 54 797         | Not stated                                                | NIH                |                                                                                                                                                        | Cohort; January<br>1977–June 2017                  | Denmark; discharge diagnoses<br>obtained by linked to the Danish<br>National Patient Registry                                                                                                                                   | Copenhagen School<br>Health Records<br>Registry | All children who attended a public<br>or private school in Copenhagen                                                                                                                                                                             |
| <a href="#">Altinkaya et al. (2014)</a><br>DOI: 10.1016/<br>j.ejogrb.2014.02.022            | 45          | 45             | 23.5 ± 5.3,<br>25.1 ± 5.7                                 | ASHRE/ASRM         | Not stated                                                                                                                                             | Cross-sectional; not<br>stated                     | Turkey; not stated                                                                                                                                                                                                              | Not stated                                      | Age-matched women who had<br>regular menses and no clinical or<br>biochemical hyperandrogenism or<br>PCO                                                                                                                                          |
| <a href="#">Ates et al. (2018)</a><br>DOI: 10.1080/<br>01443615.2017.<br>1345875            | 77          | 33             | 17.68 ±<br>1.19, 17.94<br>± 1.05                          | NIH                | Not stated                                                                                                                                             | Cohort; November<br>2012–October 2015              | Turkey; Department of<br>Gynaecology and Obstetrics at<br>University                                                                                                                                                            | Same group as PCOS                              | Age-matched adolescent girls with<br>regular menstrual cycles, normal<br>ovaries on ultrasonography and<br>the absence of symptoms of<br>hyperandrogenism who were ad-<br>mitted to the clinic for other<br>gynaecologic disorders                |
| <a href="#">Ayonrinde et al. (2016)</a><br>DOI: 10.1111/jgh.13241                           | 32          | 167            | 15.3 ± 0.3                                                | NIH                | Not stated                                                                                                                                             | Cohort; not stated                                 | Australia; Western Australian<br>Pregnancy Cohort                                                                                                                                                                               | Same group as PCOS                              |                                                                                                                                                                                                                                                   |
| <a href="#">Behboudi-Gandevani<br/>et al. (2017)</a><br>DOI: 10.1007/s40618-<br>017-0650-x  | 104         | 58             | 29.3 ± 5.3,<br>31.8 ± 5.7                                 | NIH                | Not stated                                                                                                                                             | Case–control; not<br>stated                        | Iran; Outpatient Endocrinology<br>Unit                                                                                                                                                                                          | Not stated                                      | Healthy eumenorrhoeic non-hir-<br>sute women aged 20–40 years                                                                                                                                                                                     |
| <a href="#">Boyle et al. (2015)</a><br>DOI: 10.1111/imj.12910                               | 35          | 74             | Median: 32<br>(IQR 21.0,<br>37.0), 33<br>(IQR: 23,<br>39) | NIH                | Indigenous<br>Australians                                                                                                                              | Cross-sectional;<br>2003–2005                      | Australia; Darwin Region Urban<br>Indigenous Diabetes study partici-<br>pants—living in defined geographi-<br>cal region within Darwin area,<br>Australia, for ≥6 months                                                        | Same group as PCOS                              | Non-hyperandrogenic or hyperan-<br>dogenic or idiopathic hirsutism                                                                                                                                                                                |
| <a href="#">Carmina et al. (2019)</a><br>DOI: 10.1111/cen.14063                             | 1215        | 108            | 24 ± 5,<br>range 18–40                                    | NIH                | Not stated                                                                                                                                             | Retrospective; July<br>2008–June 2018              | Italy; Department of Health<br>Sciences at University                                                                                                                                                                           | Same group as<br>control                        | Normal ovulatory women were<br>selected as controls. These<br>women were drawn from the<br>same population base, had no<br>complaints related to androgen<br>excess and were matched for age<br>with our patient population of<br>women with PCOS |
| <a href="#">Christensen et al. (2013)</a><br>DOI: 10.1016/j.fertn-<br>stert.<br>2013.04.001 | 1563        | 135 939        | 17.7 ± 1.4,<br>17.0 ± 1.5                                 | NIH                | 21.8% non-Hispanic<br>White, 9.3% Black,<br>51.8% Hispanic<br>White, 5.4% Asian/<br>Pacific Islander, 2.3%<br>other/multiple<br>Races, 9.4%<br>unknown | Cross-sectional;<br>January 2007–<br>December 2009 | USA; subset of patients enrolled in<br>large population-based cohort<br>study, KPSC Children’s Health<br>Study 2007–2009. This actively<br>enrolled children in a large, pre-<br>paid integrated managed health-<br>care system | Same group as PCOS                              | No indication of NIH criteria                                                                                                                                                                                                                     |

(continued)

**Supplementary Table SIV Continued**

| Author (year)<br>DOI                                                                      | PCOS<br>(n) | Control<br>(n) | Age,<br>mean $\pm$<br>SD                 | PCOS<br>definition | PCOS<br>ethnicity | Study design;<br>period                         | Country; PCOS<br>recruitment source                                                                           | Control recruit-<br>ment source                                                                              | Control description                                                                                                                                                                                                                                                                                                                                                       |
|-------------------------------------------------------------------------------------------|-------------|----------------|------------------------------------------|--------------------|-------------------|-------------------------------------------------|---------------------------------------------------------------------------------------------------------------|--------------------------------------------------------------------------------------------------------------|---------------------------------------------------------------------------------------------------------------------------------------------------------------------------------------------------------------------------------------------------------------------------------------------------------------------------------------------------------------------------|
| <a href="#">Çınar et al. (2016)</a><br>DOI: 10.1016/<br>j.jpag.2015.12.005                | 89          | 84             | 18.31 $\pm$<br>0.21, 18.81<br>$\pm$ 0.21 | ASHRE/ASRM         | Not stated        | Case-control;<br>January 2014–<br>December 2015 | Turkey; outpatient adolescence<br>clinic in tertiary referral hospital                                        | Not stated                                                                                                   | Normal menstrual cycles, with no<br>evidence of hyperandrogenism<br>and normal ovarian morphology<br>on pelvic ultrasonography with a<br>Ferriman–Gallwey score (FGS) <<br>8                                                                                                                                                                                              |
| <a href="#">Dadachanji et al. (2015)</a><br>DOI: 10.1016/<br>j.fertnstert.<br>2015.03.037 | 285         | 174            | 25.93 $\pm$<br>6.15, 24.97<br>$\pm$ 4.98 | ESHRE/ASRM         | Not stated        | Case-control; not<br>stated                     | India; Infertility and Endocrinology<br>outpatient clinic                                                     | General population                                                                                           | Age-matched regularly menstruat-<br>ing women with absence of any<br>clinical and/or biochemical signs<br>of hyperandrogenaemia and having<br>normal ovaries on ultrasound im-<br>aging, with the same ethnic<br>background                                                                                                                                               |
| <a href="#">De Medeiros et al. (2014)</a><br>DOI: 10.1055/s-0034-<br>1377043              | 179         | 72             | 27.08 $\pm$<br>5.45, 30.50<br>$\pm$ 5.10 | NIH, AE-PCOS       | Not stated        | Cross-sectional;<br>January 2003–June<br>2012   | Brazil; outpatient reproductive<br>and endocrine clinic in a University<br>Hospital                           | Same clinic as PCOS                                                                                          | Tubal or male cause of infertility<br>and lack of PCOS                                                                                                                                                                                                                                                                                                                    |
| <a href="#">de Zegher et al. (2017)</a><br>DOI: 10.1002/<br>oby.21935                     | 467         | 87             | 15 $\pm$ 2, 16<br>$\pm$ 2, 15 $\pm$ 1    | NIH                | >90% Caucasian    | Cross-sectional; not<br>stated                  | Spain + Germany; University<br>Hospitals in Barcelona, Spain and<br>Datteln, Germany                          | Recruited from<br>nearby schools and<br>from hospital staff                                                  | Healthy, regular menses and had<br>an ethnic background similar to<br>those of PCOS                                                                                                                                                                                                                                                                                       |
| <a href="#">Fan et al. (2012)</a><br>DOI: 10.1016/<br>j.rbmo.<br>2011.10.010              | 291         | 281            | 25.03 $\pm$<br>4.04, 28.37<br>$\pm$ 3.92 | ESHRE/ASRM         | Chinese           | Cross-sectional;<br>2006–2010                   | China; outpatient reproductive<br>endocrinology department at<br>University Hospital                          | Same clinic as PCOS                                                                                          | Infertile women due to salpingian<br>obstruction or the husband's infer-<br>tility. All were clinically healthy<br>women who had regular men-<br>strual cycles (<35 days), exhibited<br>normal circulating androgen con-<br>centrations and the absence of ob-<br>vious acne or hirsutism on physical<br>examination or polycystic ovaries<br>as determined by ultrasound |
| <a href="#">Gümüş et al. (2015)</a><br>DOI: 10.1016/<br>j.jpag.2014.08.007                | 49          | 38             | 18.8 $\pm$ 2.2,<br>19.61 $\pm$<br>2.41   | ESHRE/ASRM         | Not stated        | Case-control; June<br>2013–December<br>2013     | Turkey; outpatient adolescence<br>department                                                                  | Same clinic as PCOS                                                                                          | Patients without PCOS who had<br>been admitted for vaginal and uri-<br>nary system infections                                                                                                                                                                                                                                                                             |
| <a href="#">Gourgari et al. (2015)</a><br>DOI: 10.1210/jc.2015-<br>2566                   | 35          | 20             | 20.4 $\pm$ 4.0,<br>23.6 $\pm$ 2.6        | AE-PCOS            | Not stated        | Cross-sectional; not<br>stated                  | USA; Paediatric Endocrine<br>Division of Infants and Children's<br>Hospital and also from other<br>physicians | Database at Healthy<br>Volunteer Office of<br>the National<br>Institutes of Health +<br>local advertisement. | 18–29 years old with normal men-<br>strual function and without evi-<br>dence of PCOS were eligible; they<br>had to be off oral contraceptive<br>pills or any other medications that<br>alter steroidogenesis for at least<br>1 month prior to participating                                                                                                              |
| <a href="#">Haldar et al. (2018)</a><br>DOI: 10.1007/s00394-<br>016-1357-z                | 50          | 50             | 23.56 $\pm$<br>0.68, 24.36<br>$\pm$ 0.78 | ESHRE/ASRM         | Indian            | Case-control;<br>January 2012–<br>December 2012 | India; Outpatient Department of<br>Obstetrics and Gynaecology                                                 | Same clinic as PCOS                                                                                          | Age-matched healthy female vol-<br>unteers with regular menstrual<br>cycles (26–34 days), normal ovar-<br>ian morphology, and normal total<br>testosterone levels                                                                                                                                                                                                         |

(continued)

## Supplementary Table SIV Continued

| Author (year)<br>DOI                                                                    | PCOS<br>(n) | Control<br>(n) | Age,<br>mean $\pm$<br>SD                                                                               | PCOS<br>definition | PCOS<br>ethnicity | Study design;<br>period                         | Country; PCOS<br>recruitment source                                         | Control recruit-<br>ment source                         | Control description                                                                                                                                                                                                                                                                                                                 |
|-----------------------------------------------------------------------------------------|-------------|----------------|--------------------------------------------------------------------------------------------------------|--------------------|-------------------|-------------------------------------------------|-----------------------------------------------------------------------------|---------------------------------------------------------|-------------------------------------------------------------------------------------------------------------------------------------------------------------------------------------------------------------------------------------------------------------------------------------------------------------------------------------|
| <a href="#">Hart et al. (2011)</a><br>DOI: 10.1016/<br>j.fertnstert.<br>2011.03.001     | 61          | 143            | Age range<br>14–17 years                                                                               | ESHRE/ASRM         | Not stated        | Cohort; not stated                              | Australia; Western Australian<br>Pregnancy Cohort (Raine) Study             | Same cohort as<br>PCOS                                  |                                                                                                                                                                                                                                                                                                                                     |
| <a href="#">Hickey et al. (2011)</a><br>DOI: 10.1093/<br>humrep/der102                  | 47          | 178            | 15.2                                                                                                   | ESHRE/ASRM         | 91% Caucasian     | Cohort; not stated                              | Australia; Western Australian<br>Pregnancy Cohort (Raine) Study             | Same cohort as<br>PCOS                                  |                                                                                                                                                                                                                                                                                                                                     |
| <a href="#">Hudecova et al. (2011)</a><br>DOI: 10.1016/<br>j.fertnstert.<br>2011.08.006 | 84          | 87             | 43 $\pm$ 5.8,<br>43.7 $\pm$ 6.2                                                                        | ESHRE/ASRM         | Not stated        | Cohort; not stated                              | Sweden; out-patient register at<br>University Hospital                      | Population registers                                    | Residing in same county and born<br>during the same month as the index<br>patients. Healthy control status was<br>assured by the absence of polycystic<br>ovaries on transvaginal ultrasound.<br>Furthermore, all control subjects<br>denied a prior history of oligome-<br>norrhoea or amenorrhoea (lasting<br>more than 3 months) |
| <a href="#">Kaewnin et al. (2018)</a><br>DOI: 10.1080/<br>09513590.2017.1409716         | 29          | 519            | 18.66 $\pm$<br>0.49, 18.69<br>$\pm$ 0.47                                                               | ESHRE/ASRM         | Thai              | Cross-sectional; July<br>2016–January 2017      | Thailand; University students in<br>Bangkok                                 | Same group as PCOS                                      |                                                                                                                                                                                                                                                                                                                                     |
| <a href="#">Kim et al. (2019)</a><br>DOI: 10.1016/<br>j.fertnstert.2019.06.035          | 674         | 570            | PCOS non-<br>IR: 25.0 $\pm$<br>5.8,<br>PCOS-IR:<br>24.0 $\pm$<br>6.6,<br>Control:<br>29.0 $\pm$<br>4.5 | ESHRE/ASRM         | Korean            | Case-control; not<br>stated                     | Korea; PCOS speciality clinic at<br>University Hospital                     | Healthcare centre in<br>the same University<br>Hospital | No specific age criteria. They had<br>regular (21–35 days) menstrual<br>cycles, a modified Ferriman-<br>Gallwey score < 6, and no poly-<br>cystic ovary morphology on pelvic<br>ultrasound examination. They<br>were taking no medications and<br>did not have physician-diagnosed<br>diabetes                                      |
| <a href="#">Koivuaho et al. (2019)</a><br>DOI: 10.1038/s41366-<br>019-0318-z            | 280         | 1573           | Women<br>with PCOS<br>diagnosis by<br>age 46                                                           | NIH                | Finnish           | Cohort; not stated                              | Finland; Northern Finland Birth<br>Cohort 1966                              | Same cohort as<br>PCOS                                  | Women without any PCOS symp-<br>toms at age 31 and without PCOS<br>diagnosis by age 46                                                                                                                                                                                                                                              |
| <a href="#">Kyrkou et al. (2016)</a><br>DOI: 10.1007/s00404-<br>015-3964-y              | 230         | 155            | 24.1 $\pm$ 6.1,<br>24.7 $\pm$ 5.7                                                                      | ESHRE/ASRM         | Greek             | Cohort; not stated                              | Greece; outpatient clinic at<br>Department of Gynaecology and<br>Obstetrics | Healthcare<br>professionals                             | Healthy volunteer females (stu-<br>dents, medical and paramedical<br>students, nurses and doctors),<br>who had normal ovulatory cycles<br>(26–35 days) and no sign of<br>hyperandrogenism                                                                                                                                           |
| <a href="#">Li et al. (2013)</a><br>DOI: 10.1371/<br>journal.pone.0066250               | 3587        | 3082           | 28.35 $\pm$<br>3.75, 31.33<br>$\pm$ 4.69                                                               | ESHRE/ASRM         | Han Chinese       | Cross-sectional; June<br>2009–May 2012          | China; outpatient reproductive<br>clinic                                    | Not stated                                              | Regular menstrual cycle (26–<br>35 days) and normal ovarian mor-<br>phology. Total testosterone and<br>modified Ferriman-Gallwey score<br>were evaluated for exclusion of<br>hyperandrogenism.                                                                                                                                      |
| <a href="#">Nambiar et al. (2016)</a><br>DOI: 10.1016/<br>j.ejogrb.2016.02.031          | 282         | 200            | 28.64 $\pm$<br>5.06, 31.11<br>$\pm$ 5.13                                                               | ESHRE/ASRM         | South Indian      | Case-control;<br>December 2010–<br>October 2013 | India; Women's health and fertility<br>outpatient clinic                    | Same clinic as PCOS                                     | Not stated                                                                                                                                                                                                                                                                                                                          |

(continued)

## Supplementary Table SIV Continued

| Author (year)<br>DOI                                                                 | PCOS<br>(n) | Control<br>(n) | Age,<br>mean $\pm$<br>SD                                                                                                                                                       | PCOS<br>definition | PCOS<br>ethnicity | Study design;<br>period                  | Country; PCOS<br>recruitment source                         | Control recruit-<br>ment source  | Control description                                                                                                                                                                                                                                                                                                                                                            |
|--------------------------------------------------------------------------------------|-------------|----------------|--------------------------------------------------------------------------------------------------------------------------------------------------------------------------------|--------------------|-------------------|------------------------------------------|-------------------------------------------------------------|----------------------------------|--------------------------------------------------------------------------------------------------------------------------------------------------------------------------------------------------------------------------------------------------------------------------------------------------------------------------------------------------------------------------------|
| <a href="#">Oztas et al. (2016)</a><br>DOI: 10.1016/<br>j.ejogrb.2016.01.009         | 89          | 83             | 18.4 $\pm$ 0.8,<br>18.8 $\pm$ 0.6                                                                                                                                              | ESHRE/ASRM         | Not stated        | Case-control; April–<br>August 2014      | Turkey; outpatient reproductive<br>endocrinology clinic     | Not stated                       | Healthy age-matched adolescents<br>were also recruited as control<br>group. All adolescents were fur-<br>ther evaluated by an experienced,<br>single paediatrician in order to ex-<br>clude any possible concomitant<br>endocrinological and other sys-<br>temic diseases. All                                                                                                 |
| <a href="#">Pepene (2012)</a><br>DOI: 10.1111/j.1365-<br>2265.2011.04171.x           | 69          | 33             | Lean PCOS:<br>22.74 $\pm$<br>1.09, over-<br>weight<br>PCOS:<br>26.66 $\pm$<br>1.02, lean<br>control:<br>24.63 $\pm$<br>1.72, over-<br>weight con-<br>trol: 29.88<br>$\pm$ 1.95 | AE-PCOS            | Not stated        | Case-control; not<br>stated              | Romania; not stated                                         | Not stated                       | Controls had no evidence of clini-<br>cal and/or biochemical androgen<br>excess. In addition, exclusion cri-<br>teria were also applied to the con-<br>trol group                                                                                                                                                                                                              |
| <a href="#">Petta et al. (2017)</a><br>DOI: 10.1371/<br>journal.pone.0186136         | 202         | 101            | 33.2 $\pm$ 5.5,<br>34.9 $\pm$ 8.2                                                                                                                                              | ESHRE/ASRM         | Italian           | Cohort; January<br>2005–December<br>2015 | Italy; PCOS outpatient clinic                               | General Practitioner<br>referral | They were part of an ongoing<br>project aimed at assessing cardio-<br>vascular risk and liver damage in<br>the general population, according<br>to presence or absence of fatty<br>liver. All women enrolled as con-<br>trols had available an abdominal<br>and pelvic ultrasound performed<br>during the last year, aimed at see-<br>ing both liver and ovarian<br>morphology |
| <a href="#">Rahmanpour et al. (2012)</a><br>DOI: 10.1016/<br>j.jpap.2012.02.004      | 30          | 71             | 17.73 $\pm$<br>1.01, 17.69<br>$\pm$ 1.29                                                                                                                                       | NIH                | Iranian           | Cross-sectional; not<br>stated           | Iran; randomly selected PCOS<br>members from previous study | Same study as PCOS               | Randomly selected adolescents<br>from normal adolescents of previ-<br>ous study                                                                                                                                                                                                                                                                                                |
| <a href="#">Ramos and Spritzer<br/>(2015)</a><br>DOI: 10.1016/<br>j.gene.2015.01.012 | 199         | 99             | 22.7 $\pm$ 7.1                                                                                                                                                                 | ESHRE/ASRM         | 93.9% Caucasian   | Cross-sectional;<br>2009–2013            | Brazil; Advertisement via local<br>media                    | Same as PCOS                     |                                                                                                                                                                                                                                                                                                                                                                                |
| <a href="#">Roe et al. (2013)</a><br>DOI: 10.1016/<br>j.jpeds.2012.11.019            | 148         | 57             | 16.9 $\pm$ 1.9,<br>16.6 $\pm$ 2.5                                                                                                                                              | AE-PCOS            | 73.7% Caucasian   | Retrospective; 2008–<br>2010             | USA; Outpatient Gynaecology<br>clinic                       | Not stated                       |                                                                                                                                                                                                                                                                                                                                                                                |

(continued)

**Supplementary Table SIV Continued**

| Author (year)<br>DOI                                                               | PCOS<br>(n) | Control<br>(n) | Age,<br>mean ±<br>SD             | PCOS<br>definition | PCOS<br>ethnicity | Study design;<br>period                                          | Country; PCOS<br>recruitment source                                                         | Control recruit-<br>ment source        | Control description                                                                                                                                                                                                                                   |
|------------------------------------------------------------------------------------|-------------|----------------|----------------------------------|--------------------|-------------------|------------------------------------------------------------------|---------------------------------------------------------------------------------------------|----------------------------------------|-------------------------------------------------------------------------------------------------------------------------------------------------------------------------------------------------------------------------------------------------------|
| <a href="#">Santos et al. (2018)</a><br>DOI: 10.1186/s12958-018-0355-9             | 191         | 100            | 22.89 ±<br>6.66, 25.18<br>± 7.72 |                    | Not stated        | Cross-sectional; not<br>stated                                   | Brazil; advertisement in local<br>media                                                     | Same as PCOS                           |                                                                                                                                                                                                                                                       |
| <a href="#">Shi et al. (2013)</a><br>DOI: 10.1016/<br>j.ejogrb.2013.06.002         | 1016        | 1016           | 29.58 ±<br>3.69, 29.77<br>± 4.16 | ESHRE/ASRM         | Chinese           | Case-control; 2009–<br>2011                                      | China; outpatient reproductive<br>clinic                                                    | Same clinic as PCOS                    | Regular ovulatory menstrual cycles<br>(26–32 days), normal androgen<br>levels and ovary morphology, who<br>received IVF treatment because of<br>fallopian tube occlusion, and were<br>in general good health                                          |
| <a href="#">Wang et al. (2019)</a><br>DOI: 10.1080/<br>09513590.2019.<br>1597343   | 73          | 63             | Not stated                       | ESHRE/ASRM         | Not stated        | Case-<br>control; December<br>2014–July 2017                     | China; outpatient clinic at<br>Department of Obstetrics and<br>Gynaecology                  | Outpatient infertility<br>clinic       |                                                                                                                                                                                                                                                       |
| <a href="#">Woo et al. (2012)</a><br>DOI: 10.1507/endo-<br>crj.ej12-0055           | 87          | 53             | 25.3 ± 5.0,<br>27.8 ± 4.7        | ESHRE/ASRM         | Korean            | Cross-sectional; not<br>stated                                   | South Korea; Gynaecology outpa-<br>tient clinic at Hospital                                 | Advertisements at<br>the same hospital | Control subjects were women<br>with regular menstrual cycles (25–<br>35 days) and had no evidence of<br>hirsutism, acne, alopecia or endo-<br>crine dysfunction, and no polycys-<br>tic ovary (<12 follicles with size of<br>2–9 mm/ovary). Exclusion |
| <a href="#">Wu et al. (2018)</a><br>DOI: 10.1080/<br>09513590.<br>2017.1336216     | 33          | 38             | 15.46 ±<br>1.01, 16.07<br>± 1.14 |                    | Chinese           | Retrospective case-<br>control; January<br>2010–December<br>2013 | China; outpatient Obstetrics and<br>Gynaecology Department                                  | Same clinic as PCOS                    |                                                                                                                                                                                                                                                       |
| <b>Studies from Previous Systematic Review</b>                                     |             |                |                                  |                    |                   |                                                                  |                                                                                             |                                        |                                                                                                                                                                                                                                                       |
| <a href="#">Adali et al. (2008)</a><br>DOI: 10.1177/<br>147323000803600604         | 42          | 42             | 23.5 + 3.1                       | ESHRE/ASRM         |                   | Cross-sectional;<br>September 2007–<br>April 2008                | Turkey, outpatients clinics of<br>Department of Gynaecology and<br>Obstetrics at University | Same clinic as PCOS                    | Age-matched, similar SES                                                                                                                                                                                                                              |
| <a href="#">Al-Ojaimi (2006)</a><br>PMID: 16598331                                 | 134         | 479            | 29.4 + 5.5                       | ESHRE/ASRM         |                   | Cross-sectional; June<br>1996–June 2000                          | Bahrain, tertiary referral teaching<br>hospital                                             | Same department<br>same time period    | Normal menses, no<br>hyperandrogenism                                                                                                                                                                                                                 |
| <a href="#">Altieri et al. (2010)</a><br>DOI: 10.1016/<br>j.ejogrb.2009.11.010     | 15          | 159            | 34.7 + 4.2                       | ESHRE/ASRM         | Italian           | Retrospective;<br>January–April 2006                             | Italy, academic hospital                                                                    | Same group as PCOS                     | Eumenorrhoeic, no signs of hyper-<br>androgenism and normal ovarian<br>morphology                                                                                                                                                                     |
| <a href="#">Amato et al. (2008)</a><br>DOI: 10.1111/j.1365-<br>2265.2007.03145.x   | 170         | 34             | 24.5 + 5.8                       | ESHRE/ASRM         |                   | Retrospective, study<br>period not stated                        | Italy, outpatients clinic                                                                   | Same group as PCOS                     | Suspected of PCOS                                                                                                                                                                                                                                     |
| <a href="#">Azziz et al. (2004a)</a><br>DOI: 10.1210/jc.2003-<br>031122            | 716         | 149            | 27.7 + 7.3                       | NIH                |                   | Cross-sectional,<br>October 1987 and<br>June 2002                | USA, reproductive endocrinology<br>clinic                                                   | Same group as PCOS                     |                                                                                                                                                                                                                                                       |
| <a href="#">Bernasconi et al. (1996)</a><br>DOI: 10.1016/S0026-<br>0495(96)90202-4 | 112         | 100            | 22.5 + 5.3;<br>23.2 + 6.9        | ESHRE/ASRM         |                   | Cross-sectional;<br>study period not<br>stated                   | Italy, endocrinology clinic                                                                 | Not stated                             | Nonhirsute, eumenorrhoeic, age<br>matched                                                                                                                                                                                                             |

(continued)

**Supplementary Table SIV Continued**

| Author (year)<br>DOI                                                                     | PCOS<br>(n) | Control<br>(n) | Age,<br>mean ±<br>SD      | PCOS<br>definition | PCOS<br>ethnicity | Study design;<br>period                                      | Country; PCOS<br>recruitment source                                                               | Control recruit-<br>ment source                                                                                                                                                                                            | Control description                                                                                                                       |
|------------------------------------------------------------------------------------------|-------------|----------------|---------------------------|--------------------|-------------------|--------------------------------------------------------------|---------------------------------------------------------------------------------------------------|----------------------------------------------------------------------------------------------------------------------------------------------------------------------------------------------------------------------------|-------------------------------------------------------------------------------------------------------------------------------------------|
| <a href="#">Beydoun et al. (2009)</a><br>DOI: 10.1016/S1472-6483(10)60037-5              | 69          | 69             | 32.3 + 4.1                | NIH                |                   | Retrospective; 1<br>January 2000–31<br>December 2006         | USA, fertility treatment centre                                                                   | Same time period<br>and fertility treat-<br>ment centre as<br>PCOS                                                                                                                                                         | Age- and period-matched non-<br>PCOS women                                                                                                |
| <a href="#">Carmina et al. (2006)</a><br>DOI: 10.1210/jc.2005-1457                       | 685         | 222            | 24.5 + 4.7;<br>24.3 + 4.5 | ESHRE/ASRM         |                   | Retrospective, 1980–<br>2004                                 | Italy, two endocrinology depart-<br>ments at university                                           | Same group as PCOS<br>referred for<br>hyperandrogenism                                                                                                                                                                     | Idiopathic hirsutism and idiopathic<br>hyperandrogenism; normal ovula-<br>tory cycles and normal ovaries on<br>ultrasound                 |
| <a href="#">Chae et al. (2008)</a><br>DOI: 10.1093/humrep/<br>den239                     | 143         | 255            | 25.5 + 5.8                | ESHRE/ASRM         | Korean            | Retrospective;<br>January 2004 to<br>December 2007           | South Korea, Department of<br>Obstetrics and Gynaecology at<br>Seoul National University Hospital | Healthcare centre in<br>our hospital as a part<br>of group check-up<br>for work or an asso-<br>ciation or an individ-<br>ual need for annual<br>comprehensive medi-<br>cal check-up with no<br>specific health<br>problems | No hirsutism, acne or male-type<br>alopecia, all had regular menstrual<br>cycles, none had PCO, none had<br>any of the Rotterdam criteria |
| <a href="#">Chen et al. (2010)</a><br>DOI: 10.1210/jc.2009-<br>2698                      | 273         | 278            | 24.5 + 5.1                | ESHRE/ASRM         |                   | Cross-sectional,<br>case-control; study<br>period not stated | Taiwan, reproductive endocrinol-<br>ogy clinic                                                    | Consecutive series<br>(,35 years old) receiv-<br>ing voluntary annual<br>medical check-up at<br>the same hospital as<br>PCOS                                                                                               | Matched by 3-year age strata                                                                                                              |
| <a href="#">Cheung et al. (2008)</a><br>DOI: 10.1093/humrep/<br>den090                   | 295         | 98             | 30.2 + 6.4                | ESHRE/ASRM         | Chinese           | Cross-sectional; July<br>2003–April 2007                     | Hong Kong, endocrinology and in-<br>fertility clinics at university hospital                      | 61 from the commu-<br>nity and the remain-<br>ing were from same<br>clinic as PCOS,<br>mostly presented<br>with tubal infertility                                                                                          | Regular menstrual cycles, no hir-<br>sutism/acne or ultrasound fea-<br>tures of PCO                                                       |
| <a href="#">Chhabra and<br/>Venkatraman (2010)</a><br>DOI: 10.3109/<br>01443610903294154 | 100         | 95             | 15-34                     | NIH                |                   | Cross-sectional;<br>study period not<br>stated               | India, gynaecological outpatient<br>unit                                                          | From the same group                                                                                                                                                                                                        | Menstrual dysfunction                                                                                                                     |
| <a href="#">Ciampelli et al. (2000)</a><br>DOI: 10.1016/S0015-<br>0282(99)00602-0        | 20          | 12             | 26.4 + 1.1;<br>27.3 + 1.0 | ESHRE/ASRM         |                   | Cross-sectional;<br>study period not<br>stated               | Italy, referred to authors' hospital                                                              | Not stated                                                                                                                                                                                                                 | Normo-ovulatory                                                                                                                           |
| <a href="#">Dokras et al. (2005)</a><br>DOI: 10.1097/01.AOG.<br>0000167408.30893.6b      | 129         | 177            | Median; 28                | NIH                | 96% White         | Retrospective; 2002                                          | USA, endocrinology clinic                                                                         | Randomly selected<br>from women who<br>were seen for an an-<br>nual examination by<br>two healthcare pro-<br>viders in the gynae-<br>cology clinic over the<br>same time period as<br>the patients with<br>PCOS.           | Regular menses and an absence of<br>hirsutism                                                                                             |

(continued)

**Supplementary Table SIV Continued**

| Author (year)<br>DOI                                                             | PCOS<br>(n) | Control<br>(n) | Age,<br>mean ±<br>SD                                 | PCOS<br>definition | PCOS<br>ethnicity                      | Study design;<br>period                        | Country; PCOS<br>recruitment source                                                                                       | Control recruit-<br>ment source                                                                                    | Control description                                                                                                                                                                                                                                                                                                                              |
|----------------------------------------------------------------------------------|-------------|----------------|------------------------------------------------------|--------------------|----------------------------------------|------------------------------------------------|---------------------------------------------------------------------------------------------------------------------------|--------------------------------------------------------------------------------------------------------------------|--------------------------------------------------------------------------------------------------------------------------------------------------------------------------------------------------------------------------------------------------------------------------------------------------------------------------------------------------|
| <a href="#">Echiburú et al. (2008)</a><br>DOI: 10.1016/<br>j.metabol.2008.08.002 | 159         | 93             | 24.3 + 5.8                                           | NIH                |                                        | Cross-sectional;<br>2002–2006                  | Chile, endocrinology unit of<br>university                                                                                | Community centres<br>of the same geo-<br>graphical area as the<br>patients had the<br>same socioeconomic<br>level. | Regular 28- to 32-day menstrual<br>cycles, absence of hirsutism and<br>other manifestations of hyperan-<br>drogenism, and absence of galac-<br>torrhoea and/or thyroid<br>dysfunction                                                                                                                                                            |
| <a href="#">Economou et al. (2009)</a><br>DOI: 10.14310/<br>horm.2002.1236       | 83          | 64             | 25.0 + 4.9                                           | NIH                |                                        | Cross-sectional;<br>study period not<br>stated | Greece, PCOS-endocrine unit at<br>hospital                                                                                | Not stated                                                                                                         | Normo-androgenaemic and regu-<br>larly ovulating women                                                                                                                                                                                                                                                                                           |
| <a href="#">Ferk et al. (2007)</a><br>DOI: 10.1093/humrep/<br>del457             | 123         | 110            | 24.4 + 4.4                                           | ESHRE/ASRM         | European (Slovenian)<br>origin         | Cross-sectional;<br>2002–2005                  | Slovenia, Department of<br>Obstetrics and Gynaecology at<br>university                                                    | Authors' clinic                                                                                                    | Age-matched, healthy with proven<br>fertility (seen in clinic for normal<br>pregnancy), no menstrual cycle ir-<br>regularities, with no clinical or bio-<br>chemical hyperandrogenism and<br>without polycystic ovaries. They<br>also had no history of endocrino-<br>logical or auto-immune disorders<br>and no surgery to the pelvic<br>region |
| <a href="#">Glueck et al. (2003a)</a><br>DOI: 10.1016/s0022-<br>2143(03)00069-6  | 15          | 23             | 30.7 + 6.3                                           | NIH                | 1 Black, 14 White                      | Cross-sectional;<br>study period not<br>stated | USA, possibly outpatients of cho-<br>lesterol centre                                                                      | Same group as<br>PCOS, hospital<br>personnel                                                                       | Idiopathic intracranial<br>hypertensive                                                                                                                                                                                                                                                                                                          |
| <a href="#">Glueck et al. (2003b)</a><br>DOI: 10.1016/s0026-<br>0495(03)00104-5  | 138         | 1887           | 31.0 + 9.0                                           | NIH                | White                                  | Cross-sectional;<br>study period not<br>stated | USA, location not stated                                                                                                  | NHANES III                                                                                                         | NHANES III                                                                                                                                                                                                                                                                                                                                       |
| <a href="#">Glueck et al. (2005a)</a><br>DOI: 10.1016/<br>j.lab.2004.09.011      | 37          | 28             | PCOS and<br>control: 34<br>median;<br>IQR: 28–<br>39 | ESHRE/ASRM         | PCOS and control:<br>64 White, 1 Black | Cross-sectional;<br>study period not<br>stated | USA, possibly outpatients of cho-<br>lesterol centre                                                                      | Same group as PCOS                                                                                                 | Idiopathic intracranial<br>hypertensive                                                                                                                                                                                                                                                                                                          |
| <a href="#">Glueck et al. (2005b)</a><br>DOI: 10.1016/<br>j.ejogrb.2005.03.010   | 401         | 2586           | 30.0 + 6.0                                           | ESHRE/ASRM         | Caucasian                              | Cross-sectional;<br>study period not<br>stated | USA, patients of cholesterol<br>centre                                                                                    | NHANES I and com-<br>munity obstetrics<br>practice study                                                           | Same age group                                                                                                                                                                                                                                                                                                                                   |
| <a href="#">Glueck et al. (2006b)</a><br>DOI: 10.1016/<br>j.metabol.2005.11.003  | 37          | 157            | Median: 16.1                                         | ESHRE/ASRM         | White                                  | Case-control;<br>1997–2003                     | USA, adolescents from Ohio,<br>Kentucky, West Virginia, Indiana,<br>Michigan, and included all at cho-<br>lesterol centre | NHLBI growth and<br>health study                                                                                   | Normal, regularly cycling                                                                                                                                                                                                                                                                                                                        |
| <a href="#">Glueck et al. (2008a)</a><br>DOI: 10.1515/<br>jpem.2008.21.10.973    | 10          | 15             | 12.6 + 1.5                                           | ESHRE/ASRM         | 2 Blacks 8 Whites                      | Cross-sectional;<br>study period not<br>stated | USA, outpatients of cholesterol<br>centre                                                                                 | Same group as PCOS                                                                                                 |                                                                                                                                                                                                                                                                                                                                                  |
| <a href="#">Glueck et al. (2009)</a><br>DOI: 10.1016/<br>j.metabol.2009.02.005   | 488         | 261            | Median: 35.2<br>(IQR 33–39)                          | ESHRE/ASRM         | White                                  | Case-control; July<br>1995–May 2008            | USA, patients of cholesterol<br>centre                                                                                    | Princeton follow-up<br>study                                                                                       | Healthy free-living population, reg-<br>ular menses                                                                                                                                                                                                                                                                                              |

(continued)

## Supplementary Table SIV Continued

| Author (year)<br>DOI                                                     | PCOS<br>(n) | Control<br>(n) | Age,<br>mean $\pm$<br>SD                              | PCOS<br>definition | PCOS<br>ethnicity | Study design;<br>study period                         | Country; PCOS<br>recruitment source                                            | Control recruit-<br>ment source                                                                                                                         | Control description                                                                                                                                      |
|--------------------------------------------------------------------------|-------------|----------------|-------------------------------------------------------|--------------------|-------------------|-------------------------------------------------------|--------------------------------------------------------------------------------|---------------------------------------------------------------------------------------------------------------------------------------------------------|----------------------------------------------------------------------------------------------------------------------------------------------------------|
| Hahn <i>et al.</i> (2005)<br>DOI: 10.1530/<br>eje.1.02024                | 120         | 50             | 29.0 + 5.4                                            | NIH                |                   | Cross-sectional;<br>study period not<br>stated        | Germany, outpatient clinics                                                    | Health-screening<br>programme for<br>employees instituted<br>at the University of<br>Duisburg-Essen<br>Medical Centre<br>and by public<br>advertisement | No NIH PCOS or other medical<br>conditions                                                                                                               |
| Hahn <i>et al.</i> (2007)<br>DOI: 10.1055/s-2007-<br>967093              | 411         | 82             | 28 + 6.3                                              | NIH                | Caucasian         | Cross-sectional;<br>study period not<br>stated        | Germany, outpatient clinics                                                    | Screening pro-<br>gramme for employ-<br>ees of the University<br>of Duisburg-Essen                                                                      | Matched in sociodemographic var-<br>iables, including family status, edu-<br>cation and employment. No<br>PCOS (NIH) or any known medi-<br>cal condition |
| Liou <i>et al.</i> (2009)<br>DOI: 10.1016/<br>j.fertnstert.2008.09.003   | 295         | 169            | 26.7 + 5.4                                            | ESHRE/ASRM         | Taiwan Chinese    | Retrospective; 1<br>April 2004 to 31<br>December 2007 | Taiwan, reproductive endocrinol-<br>ogy clinic at Taipei Medical<br>University | Same group as PCOS                                                                                                                                      | No more than one of the follow-<br>ing three PCOS components: (i)<br>polycystic ovaries, (ii) oligomenor-<br>rhoea, and (iii) hyperandrogenism           |
| Mukherjee <i>et al.</i> (2009)<br>DOI: 10.1530/EJE-08-<br>0932           | 180         | 144            | 24.8 + 5.3                                            | ESHRE/ASRM         | Indian            | Case-control; study<br>period not stated              | India, infertility clinic and endocri-<br>nology clinic                        | General population                                                                                                                                      | Age-matched, regular menstrual<br>cycles and no clinical and/or bio-<br>chemical signs of hyperandroge-<br>naemia or polycystic ovaries                  |
| Nácul <i>et al.</i> (2007)<br>DOI: 10.1016/<br>j.ejogrb.2006.09.009      | 31          | 21             | 22.4 + 7.1                                            | NIH                |                   | Case-control; study<br>period not stated              | Brazil, consulting patients                                                    | Same group as PCOS                                                                                                                                      | Age-matched women with regular,<br>ovulatory cycles, normal androgen<br>levels and idiopathic hirsutism                                                  |
| Pasquali <i>et al.</i> (1993)<br>DOI: 10.1159/<br>000182732              | 100         | 138            | 20.8 + 5.9                                            | ESHRE/ASRM         |                   | Retrospective; study<br>period not stated             | Italy, location not stated                                                     | Those who attended<br>the institute for eval-<br>uation and treatment<br>of obesity or for gen-<br>eral health check-up,<br>and hospital staff          | Normal menses, no hirsutism or<br>other signs of androgenization                                                                                         |
| Patel <i>et al.</i> (2008)<br>DOI: 10.4158/<br>ep.14.2.193               | 189         | 78             | 28.9 + 7.7                                            | NIH                | USA               | Retrospective;<br>September 2001–<br>June 2006        | USA, endocrinology clinic                                                      | Randomly selected<br>from among female<br>patient with regular<br>menses by the same<br>endocrinologist in the<br>same<br>time period                   | Regular menses recruited at same<br>time period by the same<br>endocrinologist                                                                           |
| Shroff <i>et al.</i> (2007)<br>DOI: 10.1016/<br>j.fertnstert.2007.01.032 | 258         | 110            | 27.0 + 5.3;<br>30.0 + 6.3;<br>28.9 + 5;<br>28.2 + 5.8 | ESHRE/ASRM         |                   | Retrospective chart<br>review; 2002–2005              | USA, reproductive endocrinology<br>clinic                                      | Seen for annual ex-<br>amination at gynae-<br>cology clinic during<br>the same time period                                                              | Regular menses, no hirsutism                                                                                                                             |

(continued)



### Supplementary Table SIV Continued

| Author (year)<br>DOI                                                            | PCOS<br>(n) | Control<br>(n) | Age,<br>mean $\pm$<br>SD | PCOS<br>definition | PCOS<br>ethnicity | Study design;<br>period                              | Country; PCOS<br>recruitment source                           | Control recruit-<br>ment source                                                            | Control description                                                                                                                                                                                                                                                                               |
|---------------------------------------------------------------------------------|-------------|----------------|--------------------------|--------------------|-------------------|------------------------------------------------------|---------------------------------------------------------------|--------------------------------------------------------------------------------------------|---------------------------------------------------------------------------------------------------------------------------------------------------------------------------------------------------------------------------------------------------------------------------------------------------|
| <a href="#">Spranger et al. (2004)</a><br>DOI: 10.1111/j.1365-2265.2004.02159.x | 63          | 35             | 28.9 + 0.6               | NIH                |                   | Cross-sectional;<br>study period not<br>stated       | Germany, location not stated                                  | Not stated                                                                                 | No menstrual disorders or signs<br>of hyperandrogenism                                                                                                                                                                                                                                            |
| <a href="#">Vrbikova et al. (2007)</a><br>DOI: 10.1515/<br>cclm.2007.113        | 244         | 57             | 27.4 + 7.5               | ESHRE/ASRM         |                   | Cross-sectional;<br>1997–2006                        | Czech Republic, outpatient ter-<br>tiary endocrine department | Via advertisement                                                                          | All lacked symptoms of hyperan-<br>drogenism, had a regular men-<br>strual cycle (21–35 days) and had<br>androgen levels within the refer-<br>ence range                                                                                                                                          |
| <a href="#">Wang et al. (2009)</a><br>DOI: 10.1093/humrep/<br>den430            | 271         | 296            | 28.9 + 3.4               | ESHRE/ASRM         | Chinese           | Cross-sectional; 1<br>January 2004–30<br>August 2006 | China, reproductive centre clinic                             | Same geographic<br>area, recruited in the<br>same period and<br>evaluated<br>consecutively | Age-matched, normal ovulatory<br>menstrual cycles, absence of hir-<br>sutism and other manifestations of<br>hyperandrogenism, and absence<br>of sonographic signs of PCOS.<br>None of them had sign of galac-<br>torrhoea and thyroid dysfunction<br>or personal or family history of<br>diabetes |

Table design and previous 2012 SR contents taken from [Lim et al. \(2012\)](#) (*Human Reproduction Update*).
