# Supplementary material for: Childhood, adolescent, and adulthood adiposity are associated with risk of PCOS: a Mendelian randomization study with meta-analysis
Source: PubMed Central journal article supplement (PMC10233304; doi:10.1093/humrep/dead053), 2023-04-04
Supplement: dead053_supplementary_table_sv.pdf [file dead053_supplementary_table_sv.pdf]

**Supplementary Table SV Additional details of included studies.**

| Author (year)                                    | Country, PCOS recruitment source                                                                                                                                                                            | Control recruitment source                | Control description                                                                                                                                                                                                          | Measurement of height, weight, waist, and/or waist-hip ratio                                                                                                                                                       | Diet and physical activity          | Medications                                                                                                                                                                                    |
|--------------------------------------------------|-------------------------------------------------------------------------------------------------------------------------------------------------------------------------------------------------------------|-------------------------------------------|------------------------------------------------------------------------------------------------------------------------------------------------------------------------------------------------------------------------------|--------------------------------------------------------------------------------------------------------------------------------------------------------------------------------------------------------------------|-------------------------------------|------------------------------------------------------------------------------------------------------------------------------------------------------------------------------------------------|
| <b>Studies from Updated Systematic Review</b>    |                                                                                                                                                                                                             |                                           |                                                                                                                                                                                                                              |                                                                                                                                                                                                                    |                                     |                                                                                                                                                                                                |
| <a href="#">Aarestrup et al. (2021)</a>          | Denmark; discharge diagnoses obtained by linked to the Danish National Patient Registry                                                                                                                     | Copenhagen School Health Records Registry | All children who attended a public or private school in Copenhagen                                                                                                                                                           |                                                                                                                                                                                                                    |                                     |                                                                                                                                                                                                |
| <a href="#">Altinkaya et al. (2014)</a>          | Turkey; not stated                                                                                                                                                                                          | Not stated                                | Age-matched women who had regular menses and no clinical or biochemical hyperandrogenism or PCO                                                                                                                              |                                                                                                                                                                                                                    | No diet change within last 3 months | No subject has been on hormonal contraceptives or other medications for three months prior to the study                                                                                        |
| <a href="#">Ates et al. (2018)</a>               | Turkey; Department of Gynaecology and Obstetrics at University                                                                                                                                              | Same group as PCOS                        | Age-matched adolescent girls with regular menstrual cycles, normal ovaries on ultrasonography and the absence of symptoms of hyperandrogenism who were admitted to the clinic for other gynaecologic disorders               | WC was measured as the smallest circumference at the level of the umbilicus and hip circumference was measured at the levels of the major trochanters through the pubic symphysis                                  |                                     |                                                                                                                                                                                                |
| <a href="#">Ayonrinde et al. (2016)</a>          | Australia; Western Australian Pregnancy Cohort                                                                                                                                                              | Same group as PCOS                        |                                                                                                                                                                                                                              |                                                                                                                                                                                                                    |                                     |                                                                                                                                                                                                |
| <a href="#">Behboudi-Gandevani et al. (2017)</a> | Iran; Outpatient Endocrinology Unit                                                                                                                                                                         | Not stated                                | Healthy eumenorrhoeic non-hirsute women aged 20–40 years                                                                                                                                                                     | The waist circumference (WC) was measured between the lower rib margin and the iliac crest at the end of a normal expiration. The hip circumference (HC) was measured at the levels of buttocks' maximum extension |                                     | Without any medication that interfered with the normal function of the hypothalamic-pituitary-gonadal axis such as hormones, glucocorticoids, insulin sensitizers, and anti-androgen therapies |
| <a href="#">Boyle et al. (2015)</a>              | Australia; Darwin Region Urban Indigenous Diabetes study participants—living in defined geographical region within Darwin area, Australia, for $\geq 6$ months                                              | Same group as PCOS                        | Non-hyperandrogenic or hyperandrogenic or idiopathic hirsutism                                                                                                                                                               |                                                                                                                                                                                                                    |                                     |                                                                                                                                                                                                |
| <a href="#">Carmina et al. (2019)</a>            | Italy; Department of Health Sciences at University                                                                                                                                                          | Same group as Control                     | Normal ovulatory women were selected as controls. These women were drawn from the same population base, had no complaints related to androgen excess and were matched for age with our patient population of women with PCOS |                                                                                                                                                                                                                    |                                     | No patient had received any medication for at least 3 months before the study                                                                                                                  |
| <a href="#">Christensen et al. (2013)</a>        | USA; subset of patients enrolled in large population-based cohort study, KPSC Children's Health Study 2007–2009. This actively enrolled children in a large, pre-paid integrated managed health-care system | Same group as PCOS                        | No indication of NIH criteria                                                                                                                                                                                                |                                                                                                                                                                                                                    |                                     |                                                                                                                                                                                                |

(continued)

## Supplementary Table SV Continued

| Author (year)                             | Country, PCOS recruitment source                                                                     | Control recruitment source                                                                      | Control description                                                                                                                                                                                                                                                                                                                    | Measurement of height, weight, waist, and/or waist-hip ratio                                                                                                                                                                                                                                                                 | Diet and physical activity | Medications                                                                                                                                                 |
|-------------------------------------------|------------------------------------------------------------------------------------------------------|-------------------------------------------------------------------------------------------------|----------------------------------------------------------------------------------------------------------------------------------------------------------------------------------------------------------------------------------------------------------------------------------------------------------------------------------------|------------------------------------------------------------------------------------------------------------------------------------------------------------------------------------------------------------------------------------------------------------------------------------------------------------------------------|----------------------------|-------------------------------------------------------------------------------------------------------------------------------------------------------------|
| <a href="#">Çınar et al. (2016)</a>       | Turkey; outpatient adolescence clinic in tertiary referral hospital                                  | Not stated                                                                                      | Normal menstrual cycles, with no evidence of hyperandrogenism and normal ovarian morphology on pelvic ultrasonography with a Ferriman–Gallwey score (FGS) <8                                                                                                                                                                           | The BMI and WHR were assessed by a single investigator for all subjects                                                                                                                                                                                                                                                      |                            | No subjects were treated with corticosteroids, or any other medication for at least 3 months before study participation status aspirin, oral contraceptives |
| <a href="#">Dadachanji et al. (2015)</a>  | India; Infertility and Endocrinology outpatient clinic                                               | General population                                                                              | Age-matched regularly menstruating women with absence of any clinical and/or biochemical signs of hyperandrogenaemia and having normal ovaries on ultrasound imaging, with the same ethnic background                                                                                                                                  |                                                                                                                                                                                                                                                                                                                              |                            | Participants who had taken any medication that would alter hormonal parameters or lipid and carbohydrate metabolism were excluded                           |
| <a href="#">De Medeiros et al. (2014)</a> | Brazil; outpatient reproductive and endocrine clinic in a University Hospital                        | Same clinic as PCOS                                                                             | Tubal or male cause of infertility and lack of PCOS                                                                                                                                                                                                                                                                                    | Weighed on an electronic scale, and their height was measured using a Harpenden stadiometer (Holtain Limited, Crymych, Dyfed, UK). The waist was measured at the midway point between the lower rib margin and the iliac crest, and the hip was measured from the widest circumference over the great trochanters            |                            |                                                                                                                                                             |
| <a href="#">de Zegher et al. (2017)</a>   | Spain/Germany; University Hospitals in Barcelona, Spain and Datteln, Germany                         | Recruited from nearby schools and from hospital staff                                           | Healthy, regular menses and had an ethnic background similar to those of PCOS                                                                                                                                                                                                                                                          | Height and weight at PCOS diagnosis were retrieved from medical records                                                                                                                                                                                                                                                      |                            |                                                                                                                                                             |
| <a href="#">Fan et al. (2012)</a>         | China; outpatient reproductive endocrinology department at University Hospital                       | Same clinic as PCOS                                                                             | Infertile women due to salpingian obstruction or the husband's infertility. All were clinically healthy women who had regular menstrual cycles (<35 days), exhibited normal circulating androgen concentrations and the absence of obvious acne or hirsutism on physical examination or polycystic ovaries as determined by ultrasound | Waist circumference was obtained as the smallest circumference at the level of the umbilicus. Hip circumference was obtained as the widest circumference at the level of the buttocks and waist-to-hip ratio was calculated to assess body-fat distribution. Body weight in light clothing and barefoot height were measured |                            |                                                                                                                                                             |
| <a href="#">Gümüş et al. (2015)</a>       | Turkey; outpatient adolescence department                                                            | Same clinic as PCOS                                                                             | Patients without PCOS who had been admitted for vaginal and urinary system infections                                                                                                                                                                                                                                                  |                                                                                                                                                                                                                                                                                                                              |                            |                                                                                                                                                             |
| <a href="#">Gourgari et al. (2015)</a>    | USA: Paediatric Endocrine Division of Infants and Children's Hospital and also from other physicians | Database at Healthy Volunteer Office of the National Institutes of Health + local advertisement | 18–29 years old with normal menstrual function and without evidence of PCOS were eligible; they had to be off oral contraceptive pills or any other medications that alter steroidogenesis for at least 1 month prior to participating                                                                                                 | The waist-to-hip was measured by our dietitian in all participants. Waist circumference was measured at the minimum circumference between the iliac crest and the rib cage. Hip circumference was measured at the maximum protuberance of the buttocks                                                                       |                            |                                                                                                                                                             |

(continued)

## Supplementary Table SV Continued

| Author (year)                 | Country, PCOS recruitment source                                      | Control recruitment source                        | Control description                                                                                                                                                                                                                                                                                       | Measurement of height, weight, waist, and/or waist-hip ratio                                                                             | Diet and physical activity | Medications                                                                                                                                                                                                   |
|-------------------------------|-----------------------------------------------------------------------|---------------------------------------------------|-----------------------------------------------------------------------------------------------------------------------------------------------------------------------------------------------------------------------------------------------------------------------------------------------------------|------------------------------------------------------------------------------------------------------------------------------------------|----------------------------|---------------------------------------------------------------------------------------------------------------------------------------------------------------------------------------------------------------|
| Haldar <i>et al.</i> (2018)   | India; Outpatient Department of Obstetrics and Gynaecology            | Same clinic as PCOS                               | Age-matched healthy female volunteers with regular menstrual cycles (26–34 days), normal ovarian morphology, and normal total testosterone levels                                                                                                                                                         |                                                                                                                                          |                            |                                                                                                                                                                                                               |
| Hart <i>et al.</i> (2011)     | Australia; Western Australian Pregnancy Cohort (Raine) Study          | Same cohort as PCOS                               |                                                                                                                                                                                                                                                                                                           |                                                                                                                                          |                            |                                                                                                                                                                                                               |
| Hickey <i>et al.</i> (2011)   | Australia; Western Australian Pregnancy Cohort (Raine) Study          | Same cohort as PCOS                               |                                                                                                                                                                                                                                                                                                           |                                                                                                                                          |                            | Not taking any sex steroid hormones or other medication likely to interfere with pituitary, ovarian or endometrial function. Participants                                                                     |
| Hudecova <i>et al.</i> (2011) | Sweden; out-patient register at University Hospital                   | Population registers                              | Residing in same county and born during the same month as the index patients. Healthy control status was assured by the absence of polycystic ovaries on transvaginal ultrasound. Furthermore, all control subjects denied a prior history of oligomenorrhoea or amenorrhoea (lasting more than 3 months) |                                                                                                                                          |                            |                                                                                                                                                                                                               |
| Kaewnin <i>et al.</i> (2018)  | Thailand; University students in Bangkok                              | Same group as PCOS                                |                                                                                                                                                                                                                                                                                                           |                                                                                                                                          |                            |                                                                                                                                                                                                               |
| Kim <i>et al.</i> (2019)      | Korea; PCOS speciality clinic at University Hospital                  | Healthcare centre in the same University Hospital | No specific age criteria. They had regular (21–35 days) menstrual cycles, a modified Ferriman-Gallwey score < 6, and no polycystic ovary morphology on pelvic ultrasound examination. They were taking no medications and did not have physician-diagnosed diabetes                                       |                                                                                                                                          |                            | For patients on oral contraceptives at their evaluation, medication was discontinued for a minimum of 1 month before blood collection                                                                         |
| Koivuaho <i>et al.</i> (2019) | Finland; Northern Finland Birth Cohort 1966                           | Same cohort as PCOS                               | Women without any PCOS symptoms at age 31 and without PCOS diagnosis by age 46                                                                                                                                                                                                                            |                                                                                                                                          |                            |                                                                                                                                                                                                               |
| Kyrkou <i>et al.</i> (2016)   | Greece; outpatient clinic at Department of Gynaecology and Obstetrics | Healthcare professionals                          | Healthy volunteer females (students, medical and paramedical students, nurses, and doctors), who had normal ovulatory cycles (26–35 days) and no sign of hyperandrogenism                                                                                                                                 |                                                                                                                                          |                            | Treatment with compounds affecting sex hormones (oral contraceptives) or other medications within the previous 6 months served as exclusion criteria                                                          |
| Li <i>et al.</i> (2013)       | China; outpatient reproductive clinic                                 | Not stated                                        | Regular menstrual cycle (26–35 days) and normal ovarian morphology. Total testosterone and modified Ferriman-Gallwey score were evaluated for exclusion of hyperandrogenism                                                                                                                               | Waist circumference was measured midway between the lowest rib and the iliac crest. Hip circumference was the longest measurement of hip |                            | No hormonal therapy for at least 3 months prior to the test. Medication history were collected to exclude those who have had weight or glucose affecting measures like metformin or oral hypoglycaemic agents |

(continued)

### Supplementary Table SV Continued

| Author (year)                   | Country, PCOS recruitment source                         | Control recruitment source    | Control description                                                                                                                                                                                                                                                                                                                        | Measurement of height, weight, waist, and/or waist-hip ratio                                                                                                                                                                                                                   | Diet and physical activity | Medications                                                                                                                                                                                        |
|---------------------------------|----------------------------------------------------------|-------------------------------|--------------------------------------------------------------------------------------------------------------------------------------------------------------------------------------------------------------------------------------------------------------------------------------------------------------------------------------------|--------------------------------------------------------------------------------------------------------------------------------------------------------------------------------------------------------------------------------------------------------------------------------|----------------------------|----------------------------------------------------------------------------------------------------------------------------------------------------------------------------------------------------|
| Nambiar <i>et al.</i> (2016)    | India; women's health and fertility outpatient clinic    | Same clinic as PCOS           | Not stated                                                                                                                                                                                                                                                                                                                                 |                                                                                                                                                                                                                                                                                |                            |                                                                                                                                                                                                    |
| Oztas <i>et al.</i> (2016)      | Turkey; outpatient reproductive endocrinology clinic     | Not stated                    | Healthy age-matched adolescents were also recruited as control group. All adolescents were further evaluated by an experienced, single paediatrician in order to exclude any possible concomitant endocrinological and other systemic diseases. All                                                                                        |                                                                                                                                                                                                                                                                                |                            | Exclusion criteria included medications known to alter insulin secretion or action                                                                                                                 |
| Pepene (2012)                   | Romania; not stated                                      | Not stated                    | Controls had no evidence of clinical and/or biochemical androgen excess. In addition, exclusion criteria were also applied to the control group                                                                                                                                                                                            |                                                                                                                                                                                                                                                                                |                            | Exclusion based on current or previous use (within 6 months) of oral contraceptives, antiandrogens, infertility medication or drugs known to affect carbohydrate-lipid metabolism                  |
| Petta <i>et al.</i> (2017)      | Italy; PCOS outpatient clinic                            | General Practitioner referral | They were part of an ongoing project aimed at assessing cardiovascular risk and liver damage in the general population, according to presence or absence of fatty liver. All women enrolled as controls had available an abdominal and pelvic ultrasound performed during the last year, aimed at seeing both liver and ovarian morphology | Waist circumference (WC) was measured at the midpoint between the lower border of the rib cage and the iliac crest                                                                                                                                                             |                            | Excluded women treated with clomiphene citrate, oral contraceptives, antiandrogens, drugs to control their appetite or insulin-sensitizing drugs during the 6 months before the examination        |
| Rahmanpour <i>et al.</i> (2012) | Iran; randomly selected PCOS members from previous study | Same study as PCOS            | Randomly selected adolescents from normal adolescents of previous study                                                                                                                                                                                                                                                                    | Waist circumference was measured midway between the lowest rib and the iliac crest with the subject standing at the end of gentle expiration, and hip circumference at the greater trochanters. Weight was measured in kilograms and height was measured to the nearest 0.5 cm |                            | The exclusion criteria were, use of any medications known to affect sex hormone, glucose or lipid metabolism for at least a month and oral contraceptives for 3 months before entering the study   |
| Ramos and Spritzer (2015)       | Brazil; advertisement via local media                    | Same as PCOS                  |                                                                                                                                                                                                                                                                                                                                            |                                                                                                                                                                                                                                                                                |                            | No participant received any drugs known to interfere with hormone levels (such as oral contraceptive pills, antiandrogens, metformin, fibrates, or statins) for at least 3 months before the study |

(continued)

## Supplementary Table SV Continued

| Author (year)                                  | Country, PCOS recruitment source                                                      | Control recruitment source          | Control description                                                                                                                                                                                                            | Measurement of height, weight, waist, and/or waist-hip ratio | Diet and physical activity | Medications                                                                                                                                                                                                                                               |
|------------------------------------------------|---------------------------------------------------------------------------------------|-------------------------------------|--------------------------------------------------------------------------------------------------------------------------------------------------------------------------------------------------------------------------------|--------------------------------------------------------------|----------------------------|-----------------------------------------------------------------------------------------------------------------------------------------------------------------------------------------------------------------------------------------------------------|
| Roe <i>et al.</i> (2013)                       | USA; Outpatient Gynaecology clinic                                                    | Not stated                          |                                                                                                                                                                                                                                |                                                              |                            |                                                                                                                                                                                                                                                           |
| Santos <i>et al.</i> (2018)                    | Brazil; advertisement in local media                                                  | Same as PCOS                        |                                                                                                                                                                                                                                |                                                              |                            | Exclusion criteria included having used drugs known to interfere with hormone levels (such as oral contraceptive pills, antiandrogens, progestins, metformin, fibrates, or statins) for 3 or more months before the study                                 |
| Shi <i>et al.</i> (2013)                       | China; outpatient reproductive clinic                                                 | Same clinic as PCOS                 | Regular ovulatory menstrual cycles (26–32 days), normal androgen levels and ovary morphology, who received IVF treatment because of fallopian tube occlusion, and were in general good health                                  |                                                              |                            |                                                                                                                                                                                                                                                           |
| Wang <i>et al.</i> (2019)                      | China; outpatient clinic at Department of Obstetrics and Gynaecology                  | Outpatient infertility clinic       |                                                                                                                                                                                                                                |                                                              |                            |                                                                                                                                                                                                                                                           |
| Woo <i>et al.</i> (2012)                       | South Korea; Gynaecology outpatient clinic at Hospital                                | Advertisements at the same hospital | Control subjects were women with regular menstrual cycles (25–35 days) and had no evidence of hirsutism, acne, alopecia or endocrine dysfunction, and no polycystic ovary (<12 follicles with size of 2–9 mm/ovary). Exclusion |                                                              |                            | None of the subjects had taken any medications for at least 6 months prior to the study, including oral contraceptives, glucocorticoids, ovulation induction agents, anti-obesity drugs, and estrogenic, anti-androgenic, or anti-hypertensive medication |
| Wu <i>et al.</i> (2018)                        | China; Outpatient Obstetrics and Gynaecology Department                               | Same clinic as PCOS                 |                                                                                                                                                                                                                                |                                                              |                            |                                                                                                                                                                                                                                                           |
| <b>Studies from Previous Systematic Review</b> |                                                                                       |                                     |                                                                                                                                                                                                                                |                                                              |                            |                                                                                                                                                                                                                                                           |
| Adali <i>et al.</i> (2008)                     | Turkey; Outpatients clinics of Department of Gynaecology and Obstetrics at University | Same clinic as PCOS                 | Age-matched, similar SES                                                                                                                                                                                                       |                                                              |                            | No oral contraceptives, glucocorticoids, antiandrogens, insulin sensitizers, or psychiatric medications for 6 months prior                                                                                                                                |
| Al-Ojaimi (2006)                               | Bahrain, tertiary referral teaching hospital                                          | Same department same time period    | Normal menses, no hyperandrogenism                                                                                                                                                                                             |                                                              |                            |                                                                                                                                                                                                                                                           |
| Altieri <i>et al.</i> (2010)                   | Italy, academic hospital                                                              | Same group as PCOS                  | Eumenorrhoeic, no signs of hyperandrogenism, and normal ovarian morphology                                                                                                                                                     |                                                              |                            |                                                                                                                                                                                                                                                           |
| Amato <i>et al.</i> (2008)                     | Italy, outpatients clinic                                                             | Same group as PCOS                  | Suspected of PCOS                                                                                                                                                                                                              |                                                              |                            | No clomiphene citrate, oral contraceptives, anti-androgens, drugs to control their appetite, or insulin sensitizing drugs (metformin, pioglitazone, rosiglitazone) 6 months prior                                                                         |

(continued)

## Supplementary Table SV Continued

| Author (year)                                  | Country, PCOS recruitment source                                                            | Control recruitment source                                                                                                                                                              | Control description                                                                                                              | Measurement of height, weight, waist, and/or waist-hip ratio                                                                                                                                        | Diet and physical activity | Medications                                                                                                                                                                                                                                                               |
|------------------------------------------------|---------------------------------------------------------------------------------------------|-----------------------------------------------------------------------------------------------------------------------------------------------------------------------------------------|----------------------------------------------------------------------------------------------------------------------------------|-----------------------------------------------------------------------------------------------------------------------------------------------------------------------------------------------------|----------------------------|---------------------------------------------------------------------------------------------------------------------------------------------------------------------------------------------------------------------------------------------------------------------------|
| <a href="#">Azziz et al. (2004b)</a>           | USA, reproductive endocrinology clinic                                                      | Same group as PCOS                                                                                                                                                                      |                                                                                                                                  |                                                                                                                                                                                                     |                            |                                                                                                                                                                                                                                                                           |
| <a href="#">Bernasconi et al. (1996)</a>       | Italy, endocrinology clinic                                                                 | Not stated                                                                                                                                                                              | Nonhirsute, eumenorrhoeic, age-matched                                                                                           |                                                                                                                                                                                                     |                            | No medications for hirsutism for 3 months prior                                                                                                                                                                                                                           |
| <a href="#">Beydoun et al. (2009)</a>          | USA, fertility treatment centre                                                             | Same time period and fertility treatment centre as PCOS                                                                                                                                 | Age- and period-matched non PCOS women                                                                                           |                                                                                                                                                                                                     |                            |                                                                                                                                                                                                                                                                           |
| <a href="#">Carmina et al. (2006)</a>          | Italy, two endocrinology departments at university                                          | Same group as PCOS-referred for hyperandrogenism                                                                                                                                        | Idiopathic hirsutism and idiopathic hyperandrogenism; normal ovulatory cycles and normal ovaries on ultrasound                   |                                                                                                                                                                                                     |                            | No medications for 3 months prior                                                                                                                                                                                                                                         |
| <a href="#">Chae et al. (2008)</a>             | South Korea, Department of Obstetrics and Gynaecology at Seoul National University Hospital | Healthcare centre in our hospital as a part of group checkup for work or an association or an individual need for annual comprehensive medical checkup with no specific health problems | No hirsutism, acne or male-type alopecia, all had regular menstrual cycles, none had PCO, none had any of the Rotterdam criteria |                                                                                                                                                                                                     |                            | No medication affecting gonadotrophin status for 6 months prior                                                                                                                                                                                                           |
| <a href="#">Chen et al. (2010)</a>             | Taiwan, reproductive endocrinology clinic                                                   | Consecutive series (<35 years old) receiving voluntary annual medical check-up at the same hospital as PCOS                                                                             | Matched by 3-year age strata                                                                                                     |                                                                                                                                                                                                     |                            | No use of oral contraceptives within 6 months of enrolment, or the use of medications known to affect the hypothalamic-pituitary-ovarian axis, such as anti-androgens, ovulation induction agents, antidiabetic medications, anti-obesity medications, or glucocorticoids |
| <a href="#">Cheung et al. (2008)</a>           | Hong Kong, endocrinology and infertility clinics at university hospital                     | 61 from the community and the remaining were from same clinic as PCOS, mostly presented with tubal infertility                                                                          | Regular menstrual cycles, no hirsutism/acne, or ultrasound features of PCO                                                       | Narrowest measurement midway between the top of the iliac crest and the lower rib margin, whereas the hip circumference was taken as the widest measurement at the level of the greater trochanters |                            | No use of medications known to affect steroid or glucose metabolism in past 3 months                                                                                                                                                                                      |
| <a href="#">Chhabra and Venkatraman (2010)</a> | India, gynaecological outpatient unit                                                       | From the same group                                                                                                                                                                     | Menstrual dysfunction                                                                                                            |                                                                                                                                                                                                     |                            |                                                                                                                                                                                                                                                                           |
| <a href="#">Ciampelli et al. (2000)</a>        | Italy, referred to authors' hospital                                                        | Not stated                                                                                                                                                                              | Normo-ovulatory                                                                                                                  |                                                                                                                                                                                                     |                            | No medication known to affect plasma sex steroid levels for at least 3 months prior                                                                                                                                                                                       |
| <a href="#">Dokras et al. (2005)</a>           | USA, endocrinology clinic                                                                   | Randomly selected from women who were seen for an annual examination by two healthcare providers in the gynaecology                                                                     | Regular menses and an absence of hirsutism                                                                                       |                                                                                                                                                                                                     |                            | 3/129 using cholesterol-lowering medications                                                                                                                                                                                                                              |

(continued)

## Supplementary Table SV Continued

| Author (year)                                 | Country, PCOS recruitment source                                                                               | Control recruitment source                                                                           | Control description                                                                                                                                                                                                                                                                             | Measurement of height, weight, waist, and/or waist-hip ratio                                                    | Diet and physical activity                                                    | Medications                                                                                                                                           |
|-----------------------------------------------|----------------------------------------------------------------------------------------------------------------|------------------------------------------------------------------------------------------------------|-------------------------------------------------------------------------------------------------------------------------------------------------------------------------------------------------------------------------------------------------------------------------------------------------|-----------------------------------------------------------------------------------------------------------------|-------------------------------------------------------------------------------|-------------------------------------------------------------------------------------------------------------------------------------------------------|
| <a href="#">Echiburú <i>et al.</i> (2008)</a> | Chile, endocrinology unit of university                                                                        | Community centres of the same geographical area as the patients and had the same socioeconomic level | Regular 28- to 32-day menstrual cycles, absence of hirsutism and other manifestations of hyperandrogenism, and absence of galactorrhoea and/or thyroid dysfunction                                                                                                                              | Height-nearest 0.1 cm using wall-mounted stadiometer; weight-nearest 0.1 kg using a hospital balance beam scale |                                                                               |                                                                                                                                                       |
| <a href="#">Economou <i>et al.</i> (2009)</a> | Greece, PCOS-endocrine unit at hospital                                                                        | Not stated                                                                                           | Normo-androgenaemic and regularly ovulating women                                                                                                                                                                                                                                               |                                                                                                                 | Excluded if they have a history of alcohol intake of higher than 20 g per day | No oral contraceptives, insulin sensitizers or any medication interfering with metabolic or hormonal measurements in 3 months prior                   |
| <a href="#">Ferk <i>et al.</i> (2007)</a>     | Slovenia, Department of Obstetrics and Gynaecology at university                                               | Authors' clinic                                                                                      | Age-matched, healthy with proven fertility (seen in clinic for normal pregnancy), no menstrual cycle irregularities, with no clinical or biochemical hyperandrogenism and without PCO. They also had no history of endocrinological or autoimmune disorders and no surgery to the pelvic region |                                                                                                                 |                                                                               |                                                                                                                                                       |
| <a href="#">Glueck <i>et al.</i> (2003)</a>   | USA, possibly outpatients of cholesterol centre                                                                |                                                                                                      |                                                                                                                                                                                                                                                                                                 | Without shoes or over-clothes                                                                                   |                                                                               | No hormones, corticosteroids, or anticoagulants                                                                                                       |
| <a href="#">Glueck <i>et al.</i> (2003)</a>   | USA, possibly outpatients of cholesterol centre                                                                | Same group as PCOS, hospital personnel                                                               | Idiopathic intracranial hypertensive                                                                                                                                                                                                                                                            |                                                                                                                 |                                                                               |                                                                                                                                                       |
| <a href="#">Glueck <i>et al.</i> (2005a)</a>  | USA, patients of cholesterol centre                                                                            | NHANES I and community obstetrics practice study                                                     | Same age group                                                                                                                                                                                                                                                                                  | Clothed weight                                                                                                  |                                                                               | No androgens, oestrogen-progestins, oestrogen-androgens, or drugs known to effect endogenous sex hormones or lipoprotein metabolism in 2 months prior |
| <a href="#">Glueck <i>et al.</i> (2005b)</a>  | USA, possibly outpatients of cholesterol centre                                                                | Same group as PCOS                                                                                   | Idiopathic intracranial hypertensive                                                                                                                                                                                                                                                            |                                                                                                                 |                                                                               |                                                                                                                                                       |
| <a href="#">Glueck <i>et al.</i> (2006)</a>   | USA, adolescents from Ohio, Kentucky, West Virginia, Indiana, Michigan, and included all at cholesterol centre | NHLBI Growth and Health Study                                                                        | Normal, regularly cycling                                                                                                                                                                                                                                                                       |                                                                                                                 |                                                                               | No oestrogen-progestin oral contraceptives                                                                                                            |
| <a href="#">Glueck <i>et al.</i> (2008)</a>   | USA, patients of cholesterol centre                                                                            |                                                                                                      |                                                                                                                                                                                                                                                                                                 |                                                                                                                 | Encouraged to stay on low-carbohydrate high-protein diet                      |                                                                                                                                                       |

(continued)

## Supplementary Table SV Continued

| Author (year)                  | Country, PCOS recruitment source                                       | Control recruitment source                                                                                                         | Control description                                                                                                                     | Measurement of height, weight, waist, and/or waist-hip ratio                                                                                   | Diet and physical activity | Medications                                                                                                       |
|--------------------------------|------------------------------------------------------------------------|------------------------------------------------------------------------------------------------------------------------------------|-----------------------------------------------------------------------------------------------------------------------------------------|------------------------------------------------------------------------------------------------------------------------------------------------|----------------------------|-------------------------------------------------------------------------------------------------------------------|
| Glueck <i>et al.</i> (2009)    | USA, patients of cholesterol centre                                    | Princeton follow-up study                                                                                                          | Healthy free-living population, regular menses                                                                                          | Light indoor clothing without shoes, two measurements, if differed by more than 0.5 cm for ht or 0.3 kg for wt, third measurement will be done |                            |                                                                                                                   |
| Hahn <i>et al.</i> (2005)      | Germany, outpatient clinics                                            | Health-screening programme for employees instituted at the University of Duisburg-Essen Medical Centre and by public advertisement | No NIH-PCOS or other medical conditions                                                                                                 |                                                                                                                                                |                            | No prescription medication except allergy medications and occasional pain medications for at least 3 months       |
| Hahn <i>et al.</i> (2007)      | Germany, outpatient clinics                                            | Screening programme for employees of the University of Duisburg-Essen                                                              | Matched in sociodemographic variables, including family status, education, and employment. No PCOS (NIH) or any known medical condition |                                                                                                                                                |                            | No medication known to affect carbohydrate and lipid metabolism or endocrine parameters for at least 3 months     |
| Liou <i>et al.</i> (2009)      | Taiwan, reproductive endocrinology clinic at Taipei Medical University | Same group as PCOS                                                                                                                 | No more than one of the following three PCOS components: (i) PCOM, (ii) Oligo-An, and (iii) HA                                          |                                                                                                                                                |                            |                                                                                                                   |
| Mukherjee <i>et al.</i> (2009) | India, infertility clinic and endocrinology clinic                     | General population                                                                                                                 | Age-matched, regular menstrual cycles and no clinical and/or biochemical signs of hyperandrogenaemia or polycystic ovaries              |                                                                                                                                                |                            | No medication known to affect carbohydrate and lipid metabolism or endocrine parameters for 3 months prior        |
| Nácul <i>et al.</i> (2007)     | Brazil, consulting patients (from where?)                              | Same group as PCOS                                                                                                                 | Age-matched women with regular, ovulatory cycles, normal androgen levels, and idiopathic hirsutism                                      |                                                                                                                                                |                            | No drugs known to interfere with hormonal levels for 3 months prior; no heparin or aspirin within 15 days of test |
| Pasquali <i>et al.</i> (1993)  | Italy, location not stated                                             | Those who attended the institute for evaluation and treatment of obesity or for general health checkup, and hospital staff         | Normal menses, no hirsutism, or other signs of androgenization                                                                          | Without shoes to the nearest 0.5 cm and body weight without clothes                                                                            |                            |                                                                                                                   |
| Patel <i>et al.</i> (2008)     | USA, endocrinology clinic                                              | Randomly selected from among female patients with regular menses by the same endocrinologist in the same time period               | Regular menses recruited at same time period by the same endocrinologist                                                                |                                                                                                                                                |                            | No lipid lowering agents or anti-hypertensive agents (except spironolactone)                                      |
| Shroff <i>et al.</i> (2007)    | USA, reproductive endocrinology clinic                                 | Seen for annual examination at gynaecology clinic during same time period                                                          | Regular menses, no hirsutism                                                                                                            |                                                                                                                                                |                            |                                                                                                                   |
| Spranger <i>et al.</i> (2004)  | Germany, location not stated                                           | Not stated                                                                                                                         | No menstrual disorders or signs of hyperandrogenism                                                                                     |                                                                                                                                                |                            | No medication                                                                                                     |

(continued)



### Supplementary Table SV Continued

| Author (year)                          | Country, PCOS recruitment source                         | Control recruitment source                                                     | Control description                                                                                                                                                                                                                                                   | Measurement of height, weight, waist, and/or waist-hip ratio | Diet and physical activity | Medications                                                                        |
|----------------------------------------|----------------------------------------------------------|--------------------------------------------------------------------------------|-----------------------------------------------------------------------------------------------------------------------------------------------------------------------------------------------------------------------------------------------------------------------|--------------------------------------------------------------|----------------------------|------------------------------------------------------------------------------------|
| <a href="#">Vrbikova et al. (2007)</a> | Czech Republic, outpatient tertiary endocrine department | Via advertisement                                                              | All lacked symptoms of hyperandrogenism, had a regular menstrual cycle (21–35 days), and had androgen levels within the reference range                                                                                                                               | To nearest 0.1 kg and height to nearest cm                   |                            |                                                                                    |
| <a href="#">Wang et al. (2009)</a>     | China, reproductive centre clinic                        | Same geographic area, recruited in the same period and evaluated consecutively | Age-matched, normal ovulatory menstrual cycles, absence of hirsutism and other manifestations of hyperandrogenism, and absence of sonographic signs of PCOS. None of them had sign of galactorrhoea and thyroid dysfunction or personal or family history of diabetes |                                                              |                            | No hormonal preparations, including oral contraceptives for at least 3 weeks prior |

Table design and previous SR contents taken from 2012 SR by [Lim et al. \(2012\)](#) (*Human Reproduction Update*).
