# Supplementary material for: Childhood, adolescent, and adulthood adiposity are associated with risk of PCOS: a Mendelian randomization study with meta-analysis
Source: PubMed Central journal article supplement (PMC10233304; doi:10.1093/humrep/dead053), 2023-04-04
Supplement: dead053_supplementary_table_svi.pdf [file dead053_supplementary_table_svi.pdf]

**Supplementary Table SVI Summary of quality assessment of included studies.**

| Author (year)                                    | Selection | Comparability | Exposure | Total |
|--------------------------------------------------|-----------|---------------|----------|-------|
| <a href="#">Aarestrup et al. (2021)</a>          | 2         | 1             | 2        | 5     |
| <a href="#">Adali et al. (2008)</a>              | 2         | 2             | 2        | 6     |
| <a href="#">Al-Ojaimi (2006)</a>                 | 2         | 1             | 2        | 5     |
| <a href="#">Altieri et al. (2010)</a>            | 2         | 0             | 1        | 3     |
| <a href="#">Altinkaya et al. (2014)</a>          | 3         | 1             | 1        | 5     |
| <a href="#">Amato et al. (2008)</a>              | 2         | 1             | 1        | 4     |
| <a href="#">Ates et al. (2018)</a>               | 3         | 2             | 2        | 7     |
| <a href="#">Ayonrinde et al. (2016)</a>          | 3         | 0             | 2        | 5     |
| <a href="#">Azziz et al. (2004a)</a>             | 2         | 0             | 2        | 4     |
| <a href="#">Behboudi-Gandevani et al. (2017)</a> | 3         | 1             | 2        | 6     |
| <a href="#">Bernasconi et al. (1996)</a>         | 2         | 2             | 0        | 4     |
| <a href="#">Beydoun et al. (2009)</a>            | 2         | 2             | 1        | 5     |
| <a href="#">Boyle et al. (2015)</a>              | 2         | 1             | 1        | 4     |
| <a href="#">Carmina et al. (2019)</a>            | 3         | 2             | 2        | 7     |
| <a href="#">Carmina et al. (2006)</a>            | 2         | 0             | 1        | 3     |
| <a href="#">Chae et al. (2008)</a>               | 3         | 1             | 2        | 6     |
| <a href="#">Chen et al. (2010)</a>               | 2         | 1             | 0        | 3     |
| <a href="#">Cheung et al. (2008)</a>             | 3         | 0             | 2        | 5     |
| <a href="#">Chhabra and Venkatraman (2010)</a>   | 2         | 0             | 1        | 3     |
| <a href="#">Christensen et al. (2013)</a>        | 2         | 1             | 2        | 5     |
| <a href="#">Ciampelli et al. (2000)</a>          | 2         | 0             | 0        | 2     |
| <a href="#">Çinar et al. (2016)</a>              | 3         | 1             | 2        | 6     |
| <a href="#">Dadachanji et al. (2015)</a>         | 3         | 2             | 3        | 8     |
| <a href="#">De Medeiros et al. (2014)</a>        | 2         | 0             | 2        | 4     |
| <a href="#">de Zegher et al. (2017)</a>          | 2         | 1             | 3        | 6     |
| <a href="#">Dokras et al. (2005)</a>             | 2         | 1             | 0        | 3     |
| <a href="#">Echiburú et al. (2008)</a>           | 3         | 1             | 2        | 6     |
| <a href="#">Economou et al. (2009)</a>           | 2         | 0             | 2        | 4     |
| <a href="#">Fan et al. (2012)</a>                | 2         | 1             | 2        | 5     |
| <a href="#">Ferk et al. (2007)</a>               | 3         | 2             | 0        | 5     |
| <a href="#">Glueck et al. (2003a)</a>            | 2         | 0             | 0        | 2     |
| <a href="#">Glueck et al. (2003b)</a>            | 3         | 0             | 1        | 4     |
| <a href="#">Glueck et al. (2005a)</a>            | 3         | 1             | 1        | 5     |
| <a href="#">Glueck et al. (2005b)</a>            | 2         | 2             | 0        | 4     |
| <a href="#">Glueck et al. (2006b)</a>            | 3         | 1             | 1        | 5     |
| <a href="#">Glueck et al. (2008a)</a>            | 2         | 0             | 2        | 4     |
| <a href="#">Glueck et al. (2009)</a>             | 3         | 1             | 1        | 5     |
| <a href="#">Gourgari et al. (2015)</a>           | 2         | 1             | 2        | 5     |
| <a href="#">Gümüş et al. (2015)</a>              | 2         | 1             | 2        | 5     |
| <a href="#">Hahn et al. (2005)</a>               | 3         | 0             | 2        | 5     |
| <a href="#">Hahn et al. (2007)</a>               | 3         | 2             | 2        | 7     |
| <a href="#">Haldar et al. (2018)</a>             | 3         | 1             | 2        | 6     |

(continued)

## Supplementary Table SVI Continued

| Author (year)             | Selection | Comparability | Exposure | Total |
|---------------------------|-----------|---------------|----------|-------|
| Hart et al. (2011)        | 2         | 1             | 2        | 5     |
| Hickey et al. (2011)      | 3         | 1             | 2        | 6     |
| Hudecova et al. (2011)    | 3         | 2             | 0        | 5     |
| Kaewnin et al. (2018)     | 1         | 0             | 2        | 3     |
| Kim et al. (2019)         | 4         | 2             | 2        | 8     |
| Koivuaho et al. (2019)    | 1         | 0             | 2        | 3     |
| Kyrkou et al. (2016)      | 2         | 1             | 2        | 5     |
| Li et al. (2013)          | 2         | 0             | 3        | 5     |
| Liou et al. (2009)        | 2         | 0             | 1        | 3     |
| Mukherjee et al. (2009)   | 4         | 1             | 2        | 7     |
| Nácul et al. (2007)       | 2         | 1             | 2        | 5     |
| Nambiar et al. (2016)     | 2         | 0             | 2        | 4     |
| Oztas et al. (2016)       | 2         | 1             | 3        | 6     |
| Pasquali et al. (1993)    | 2         | 1             | 2        | 5     |
| Patel et al. (2008)       | 2         | 1             | 1        | 4     |
| Pepene (2012)             | 1         | 0             | 3        | 4     |
| Petta et al. (2017)       | 4         | 1             | 3        | 8     |
| Rahmanpour et al. (2012)  | 2         | 1             | 3        | 6     |
| Ramos and Spritzer (2015) | 3         | 0             | 2        | 5     |
| Roe et al. (2013)         | 1         | 0             | 1        | 2     |
| Santos et al. (2018)      | 2         | 0             | 2        | 4     |
| Shi et al. (2013)         | 2         | 1             | 2        | 5     |
| Shroff et al. (2007)      | 1         | 1             | 0        | 2     |
| Spranger et al. (2004)    | 2         | 0             | 0        | 2     |
| Vrbikova et al. (2007)    | 3         | 0             | 2        | 5     |
| Wang et al. (2019)        | 2         | 1             | 3        | 6     |
| Wang et al. (2009)        | 4         | 2             | 2        | 8     |
| Woo et al. (2012)         | 2         | 0             | 3        | 5     |
| Wu et al. (2018)          | 2         | 1             | 3        | 6     |

Maximum score of 9.

### SELECTION.

(1) Is the definition of PCOS adequate? (a) yes, with independent validation\*, (b) yes, e.g. record linkage or based on self-reports, (c) no description.

(2) Representativeness of the cases: (a) consecutive or obviously representative series of cases\*, (b) potential for selection biases or not stated.

(3) Selection of controls: (a) community controls\*, (b) hospital controls, (c) no description.

(4) Definition of controls: (a) no feature of PCOS\*, (b) no description of source.

### COMPARABILITY.

(1) Comparability of cases and controls on basis of design or analysis: (a) study controls for age\*, (b) study controls for any additional factor\*.

### EXPOSURE.

(1) Ascertainment of exposure: (a) secure record (e.g. surgical records) or independently measured\*, (b) structured interview where blind to case/control status\*, (c) interview not blinded to case/control status, (d) written self-report or medical record only, (e) no description.

(2) Same method of ascertainment for cases and controls: (a) yes\*, (b) no.

(3) Non-response rate: (a) same rate for both groups\*, (b) non-respondents described, (c) rate different and no designation.

\*A study can be awarded a maximum of one star for each numbered item within the Selection and Exposure categories. A maximum of two stars can be given for Comparability.

Table design and table legend taken from [Lim et al. \(2012\)](#) (*Human Reproduction Update*).
